# Supplementary material
Source: publisher figshare collection journal article supplement (https://tandf.figshare.com/articles/dataset/_/11097479)
Supplement: Supplementary file 1 [file 1]

Archive with 3 entries (3 files):
- tnzg_a_1691611_sm5187.pdf
- tnzg_a_1691611_sm3031.xlsx
- tnzg_a_1691611_sm3030.pdf
