# Supplementary material
Source: publisher figshare collection journal article supplement (https://tandf.figshare.com/articles/dataset/_/11097479)
Supplement: Supplementary file 1 [file 1 › tnzg_a_1691611_sm3030.pdf]

| Name: Pourewa Stream section                                   |                                                                                     |           |                                                                                     | Coordinates (NZTM)         | Elev (masl) |                                                                                                                                                                                                                                                                                                                                                                                                                                                                                                                                                                                                                                                                                                                                                                                                                                                                                                                                                                                                                                                                                                                                                                                    |
|----------------------------------------------------------------|-------------------------------------------------------------------------------------|-----------|-------------------------------------------------------------------------------------|----------------------------|-------------|------------------------------------------------------------------------------------------------------------------------------------------------------------------------------------------------------------------------------------------------------------------------------------------------------------------------------------------------------------------------------------------------------------------------------------------------------------------------------------------------------------------------------------------------------------------------------------------------------------------------------------------------------------------------------------------------------------------------------------------------------------------------------------------------------------------------------------------------------------------------------------------------------------------------------------------------------------------------------------------------------------------------------------------------------------------------------------------------------------------------------------------------------------------------------------|
| Location: Leedstown Stream near confluence with Pourewa Stream |                                                                                     |           |                                                                                     | -40.019464 S, 175.472302 E | 178         |                                                                                                                                                                                                                                                                                                                                                                                                                                                                                                                                                                                                                                                                                                                                                                                                                                                                                                                                                                                                                                                                                                                                                                                    |
|                                                                |                                                                                     |           |                                                                                     |                            | 1 of 3      |                                                                                                                                                                                                                                                                                                                                                                                                                                                                                                                                                                                                                                                                                                                                                                                                                                                                                                                                                                                                                                                                                                                                                                                    |
| Age                                                            | Formation                                                                           | Scale (m) | Grain size                                                                          | Sample                     | Comments:   |                                                                                                                                                                                                                                                                                                                                                                                                                                                                                                                                                                                                                                                                                                                                                                                                                                                                                                                                                                                                                                                                                                                                                                                    |
|                                                                |                                                                                     |           | mud   silt   sand   gravel                                                          |                            |             |                                                                                                                                                                                                                                                                                                                                                                                                                                                                                                                                                                                                                                                                                                                                                                                                                                                                                                                                                                                                                                                                                                                                                                                    |
| LATE PLEISTOCENE                                               | REU REU FORMATION                                                                   | 50        | 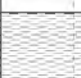   |                            |             | <p>-Sandy siltstone, blue grey, weakly cemented, massive to laminated, sparsely fossiliferous, fossils being preserved in life position dominated by <i>Amalda novaezelandia</i>, <i>Atrina</i> and <i>Alciiothe</i> sp.</p> <p>-Crossbedded shell conglomerate, weakly cemented, loosely packed, matrix supported, sub-rounded to rounded clasts of greywacke, pumice and crushed shell material, 10% shell material preserved whole predominantly <i>Paphies</i> sp.</p> <p>-Fine grained sandstone bed, weakly cemented</p> <p>-Massive to laminated blue grey siltstone, trace fine grained sand, weakly cemented, sparse in situ fossils preseved</p> <p>-Sandy Siltstone, laminated, occasiona, lenticular beds, weakly cemented</p> <p>-Fine grained sandstone, laminae sets, occasional wavy laminae sets, weakly cemented, loosely packed</p> <p>-Normal graded sandstone, coarse to fine grained, sparse fossils typically crushed, planar laminae to wavy laminae beds, weakly cemented, loosely packed</p>                                                                                                                                                             |
|                                                                |                                                                                     | 47.5      | 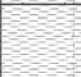   |                            |             |                                                                                                                                                                                                                                                                                                                                                                                                                                                                                                                                                                                                                                                                                                                                                                                                                                                                                                                                                                                                                                                                                                                                                                                    |
|                                                                |                                                                                     | 45        | 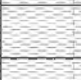   |                            |             |                                                                                                                                                                                                                                                                                                                                                                                                                                                                                                                                                                                                                                                                                                                                                                                                                                                                                                                                                                                                                                                                                                                                                                                    |
|                                                                |                                                                                     | 42.5      | 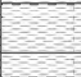   |                            |             |                                                                                                                                                                                                                                                                                                                                                                                                                                                                                                                                                                                                                                                                                                                                                                                                                                                                                                                                                                                                                                                                                                                                                                                    |
|                                                                |                                                                                     | 40        | 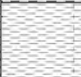   |                            |             |                                                                                                                                                                                                                                                                                                                                                                                                                                                                                                                                                                                                                                                                                                                                                                                                                                                                                                                                                                                                                                                                                                                                                                                    |
|                                                                |                                                                                     | 37.5      | 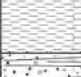   |                            |             |                                                                                                                                                                                                                                                                                                                                                                                                                                                                                                                                                                                                                                                                                                                                                                                                                                                                                                                                                                                                                                                                                                                                                                                    |
|                                                                |                                                                                     | 35        | 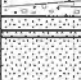  |                            |             |                                                                                                                                                                                                                                                                                                                                                                                                                                                                                                                                                                                                                                                                                                                                                                                                                                                                                                                                                                                                                                                                                                                                                                                    |
|                                                                |                                                                                     | 32.5      | 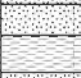 |                            |             |                                                                                                                                                                                                                                                                                                                                                                                                                                                                                                                                                                                                                                                                                                                                                                                                                                                                                                                                                                                                                                                                                                                                                                                    |
|                                                                |                                                                                     | 30        | 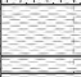 |                            |             |                                                                                                                                                                                                                                                                                                                                                                                                                                                                                                                                                                                                                                                                                                                                                                                                                                                                                                                                                                                                                                                                                                                                                                                    |
|                                                                |                                                                                     | 27.5      | 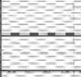 |                            |             |                                                                                                                                                                                                                                                                                                                                                                                                                                                                                                                                                                                                                                                                                                                                                                                                                                                                                                                                                                                                                                                                                                                                                                                    |
|                                                                | WAIOMIO FORMATION                                                                   | 25        | 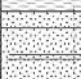 |                            |             | <p>-Sandy Siltstone, laminated, occasiona, lenticular beds, weakly cemented</p> <p>-Fine grained sandstone, laminae sets, occasional wavy laminae sets, weakly cemented, loosely packed</p> <p>-Normal graded sandstone, coarse to fine grained, sparse fossils typically crushed, planar laminae to wavy laminae beds, weakly cemented, loosely packed</p> <p>-Cross-bedded shell conglomerate, abundant crushed and worn shell material, matrix supported ,fine to medium sized greywacke pebbles, fossils dominated by <i>Paphies</i> sp., <i>Austrovenus</i>, <i>Cominella</i> sp., <i>Cyclomactra tristis</i>, <i>Ruditapes largillerti</i>, <i>Amalda australis</i>, fragments of <i>Pecten novaezelandiae</i>, <i>Tanea zelandica</i>, <i>Glycymeris modesta</i>, and <i>Chlamys gemmulata</i></p> <p>-Reverse graded siltstone, becoming sandy upsection, blue grey</p> <p>-Siltstone, blue grey, thin laminae sets</p> <p>-Medium to coarse grained sandstone with some crushed shell material and fine to medium sized, rounded greywacke pebbles.</p> <p>-Coarse grained sandstone with crushed shell material and fine to medium sized, rounded greywacke pebbles.</p> |
|                                                                |                                                                                     | 22.5      | 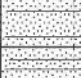 |                            |             |                                                                                                                                                                                                                                                                                                                                                                                                                                                                                                                                                                                                                                                                                                                                                                                                                                                                                                                                                                                                                                                                                                                                                                                    |
|                                                                |                                                                                     | 20        | 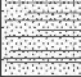 |                            |             |                                                                                                                                                                                                                                                                                                                                                                                                                                                                                                                                                                                                                                                                                                                                                                                                                                                                                                                                                                                                                                                                                                                                                                                    |
|                                                                |                                                                                     | 17.5      | 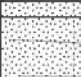 |                            |             |                                                                                                                                                                                                                                                                                                                                                                                                                                                                                                                                                                                                                                                                                                                                                                                                                                                                                                                                                                                                                                                                                                                                                                                    |
|                                                                |                                                                                     | 15        | 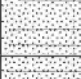 |                            |             |                                                                                                                                                                                                                                                                                                                                                                                                                                                                                                                                                                                                                                                                                                                                                                                                                                                                                                                                                                                                                                                                                                                                                                                    |
|                                                                |                                                                                     | 12.5      | 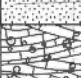 |                            |             |                                                                                                                                                                                                                                                                                                                                                                                                                                                                                                                                                                                                                                                                                                                                                                                                                                                                                                                                                                                                                                                                                                                                                                                    |
|                                                                |                                                                                     | 10        | 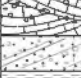 |                            |             |                                                                                                                                                                                                                                                                                                                                                                                                                                                                                                                                                                                                                                                                                                                                                                                                                                                                                                                                                                                                                                                                                                                                                                                    |
|                                                                |                                                                                     | 7.5       | 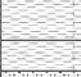 |                            |             |                                                                                                                                                                                                                                                                                                                                                                                                                                                                                                                                                                                                                                                                                                                                                                                                                                                                                                                                                                                                                                                                                                                                                                                    |
|                                                                |                                                                                     | 5         | 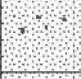 |                            |             |                                                                                                                                                                                                                                                                                                                                                                                                                                                                                                                                                                                                                                                                                                                                                                                                                                                                                                                                                                                                                                                                                                                                                                                    |
|                                                                |                                                                                     | 2.5       | 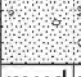 |                            |             |                                                                                                                                                                                                                                                                                                                                                                                                                                                                                                                                                                                                                                                                                                                                                                                                                                                                                                                                                                                                                                                                                                                                                                                    |
| 0                                                              | 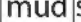 |           |                                                                                     |                            |             |                                                                                                                                                                                                                                                                                                                                                                                                                                                                                                                                                                                                                                                                                                                                                                                                                                                                                                                                                                                                                                                                                                                                                                                    |
|                                                                |                                                                                     |           | mud   silt   sand   gravel                                                          |                            |             |                                                                                                                                                                                                                                                                                                                                                                                                                                                                                                                                                                                                                                                                                                                                                                                                                                                                                                                                                                                                                                                                                                                                                                                    |

| Name: Pourewa Stream section                                             |                     |           | Coordinates (NZTM)         |        | Elev (masl)                                                                                                                                                                                                                                                                                                                                                                                                                                                                                                                                                                                                                                                                                                                                                                                                                                                                                                                                                                                                                                                                                                                                                                                                                                                                                                                                                                                                                                                                                                                                                                                                                                                                                                                                                                                                                                                                                                                                                                                                                                                                                                                                                                                                                                                                                                                                                                                                                                                   |
|--------------------------------------------------------------------------|---------------------|-----------|----------------------------|--------|---------------------------------------------------------------------------------------------------------------------------------------------------------------------------------------------------------------------------------------------------------------------------------------------------------------------------------------------------------------------------------------------------------------------------------------------------------------------------------------------------------------------------------------------------------------------------------------------------------------------------------------------------------------------------------------------------------------------------------------------------------------------------------------------------------------------------------------------------------------------------------------------------------------------------------------------------------------------------------------------------------------------------------------------------------------------------------------------------------------------------------------------------------------------------------------------------------------------------------------------------------------------------------------------------------------------------------------------------------------------------------------------------------------------------------------------------------------------------------------------------------------------------------------------------------------------------------------------------------------------------------------------------------------------------------------------------------------------------------------------------------------------------------------------------------------------------------------------------------------------------------------------------------------------------------------------------------------------------------------------------------------------------------------------------------------------------------------------------------------------------------------------------------------------------------------------------------------------------------------------------------------------------------------------------------------------------------------------------------------------------------------------------------------------------------------------------------------|
| Location: Pourewa Stream c. 3.6 km from confluence with Rangitikei River |                     |           | -40.046934 S, 175.456424 E |        | 117                                                                                                                                                                                                                                                                                                                                                                                                                                                                                                                                                                                                                                                                                                                                                                                                                                                                                                                                                                                                                                                                                                                                                                                                                                                                                                                                                                                                                                                                                                                                                                                                                                                                                                                                                                                                                                                                                                                                                                                                                                                                                                                                                                                                                                                                                                                                                                                                                                                           |
|                                                                          |                     |           |                            |        | 2 of 3                                                                                                                                                                                                                                                                                                                                                                                                                                                                                                                                                                                                                                                                                                                                                                                                                                                                                                                                                                                                                                                                                                                                                                                                                                                                                                                                                                                                                                                                                                                                                                                                                                                                                                                                                                                                                                                                                                                                                                                                                                                                                                                                                                                                                                                                                                                                                                                                                                                        |
| Age                                                                      | Formation           | Scale (m) | Grain size                 | Sample | Comments:                                                                                                                                                                                                                                                                                                                                                                                                                                                                                                                                                                                                                                                                                                                                                                                                                                                                                                                                                                                                                                                                                                                                                                                                                                                                                                                                                                                                                                                                                                                                                                                                                                                                                                                                                                                                                                                                                                                                                                                                                                                                                                                                                                                                                                                                                                                                                                                                                                                     |
|                                                                          |                     |           | mud silt sand gravel       |        |                                                                                                                                                                                                                                                                                                                                                                                                                                                                                                                                                                                                                                                                                                                                                                                                                                                                                                                                                                                                                                                                                                                                                                                                                                                                                                                                                                                                                                                                                                                                                                                                                                                                                                                                                                                                                                                                                                                                                                                                                                                                                                                                                                                                                                                                                                                                                                                                                                                               |
| LATE PLEISTOCENE                                                         | TOKORANGI FORMATION | 50        |                            |        | -Thin condensed shell bed with rounded to subrounded clasts of greywacke and abundant well preserved <i>Glycymeris modesta</i><br><br>-Coarse grained sandstone with lenses of granules, crossbedded to laminated, lenses of small pebbles and rip up clasts of siltstone present, minor water escape structures, trace pumice predominantly siliciclastic, uncemented, loosely packed<br><br>-Fine to coarse grained sandstone sets, normal grading, intercalated siltstone, dominantly laminated with some lenticular bedding, sparsely fossiliferous weakly cemented, tightly packed<br><br>-Blue grey siltstone, trace fine grained sand, weakly cemented, massive, sparsely fossiliferous, predominantly in-situ <i>Amalda novaezelandiae</i><br><br>-Normal graded sandstone coarse to fine grained, laminae sets, weakly cemented, non fossiliferous, loosely packed<br><br>-Crushed shell conglomerate, cross bedded, rounded greywacke pebbles and abundant crushed shell material, rare <i>Pecten sp.</i> identified, cemented by calcite<br><br>-Normal graded sandstone coarse to medium grained, trace granules at base, wavy laminae sets, weakly cemented, sparsely fossiliferous, loosely packed<br><br>-Crushed shell conglomerate, with rounded to sub-rounded small to large pebbles of greywacke fossils are predominantly crushed, 30% preserved whole, disarticulated, including <i>Chlamys gemmulata</i> , <i>Glycymeris modesta</i> , <i>Pecten novaezelandiae</i> , <i>Tiostrea chilensis</i> , <i>Maoricolpus roseus</i> and <i>Alchithoe arabica</i> , cemented by calcite<br><br>-Clast supported conglomerate, indistinct planar laminae and wavy laminae sets, clasts are predominantly rounded normal grading into large to small pebbles, moderately well sorted, cemented<br><br>-Clast supported conglomerate, indistinct bedding, rare lenses of fine sandstone and siltstone preserved, clasts are rounded to sub-rounded pebbles to cobbles, predominantly greywacke, non-fossiliferous, cemented<br><br>-Lens of siltstone within the conglomerate, discontinuous, wavy bedding,<br><br>-Clast supported conglomerate, indistinct wavy laminae, fine grained lags surrounding particularly large clasts, predominantly pebble to cobble in size, composed of greywacke, minor argillite, jasper, chert, rhyolite, pumice and andesite, thin lenses of fine sand and silt discontinuously preserved throughout, cemented |
|                                                                          |                     | 47.5      |                            |        |                                                                                                                                                                                                                                                                                                                                                                                                                                                                                                                                                                                                                                                                                                                                                                                                                                                                                                                                                                                                                                                                                                                                                                                                                                                                                                                                                                                                                                                                                                                                                                                                                                                                                                                                                                                                                                                                                                                                                                                                                                                                                                                                                                                                                                                                                                                                                                                                                                                               |
|                                                                          |                     | 45        |                            |        |                                                                                                                                                                                                                                                                                                                                                                                                                                                                                                                                                                                                                                                                                                                                                                                                                                                                                                                                                                                                                                                                                                                                                                                                                                                                                                                                                                                                                                                                                                                                                                                                                                                                                                                                                                                                                                                                                                                                                                                                                                                                                                                                                                                                                                                                                                                                                                                                                                                               |
|                                                                          |                     | 42.5      |                            |        |                                                                                                                                                                                                                                                                                                                                                                                                                                                                                                                                                                                                                                                                                                                                                                                                                                                                                                                                                                                                                                                                                                                                                                                                                                                                                                                                                                                                                                                                                                                                                                                                                                                                                                                                                                                                                                                                                                                                                                                                                                                                                                                                                                                                                                                                                                                                                                                                                                                               |
|                                                                          |                     | 40        |                            |        |                                                                                                                                                                                                                                                                                                                                                                                                                                                                                                                                                                                                                                                                                                                                                                                                                                                                                                                                                                                                                                                                                                                                                                                                                                                                                                                                                                                                                                                                                                                                                                                                                                                                                                                                                                                                                                                                                                                                                                                                                                                                                                                                                                                                                                                                                                                                                                                                                                                               |
|                                                                          |                     | 37.5      |                            |        |                                                                                                                                                                                                                                                                                                                                                                                                                                                                                                                                                                                                                                                                                                                                                                                                                                                                                                                                                                                                                                                                                                                                                                                                                                                                                                                                                                                                                                                                                                                                                                                                                                                                                                                                                                                                                                                                                                                                                                                                                                                                                                                                                                                                                                                                                                                                                                                                                                                               |
|                                                                          |                     | 35        |                            |        |                                                                                                                                                                                                                                                                                                                                                                                                                                                                                                                                                                                                                                                                                                                                                                                                                                                                                                                                                                                                                                                                                                                                                                                                                                                                                                                                                                                                                                                                                                                                                                                                                                                                                                                                                                                                                                                                                                                                                                                                                                                                                                                                                                                                                                                                                                                                                                                                                                                               |
|                                                                          |                     | 32.5      |                            |        |                                                                                                                                                                                                                                                                                                                                                                                                                                                                                                                                                                                                                                                                                                                                                                                                                                                                                                                                                                                                                                                                                                                                                                                                                                                                                                                                                                                                                                                                                                                                                                                                                                                                                                                                                                                                                                                                                                                                                                                                                                                                                                                                                                                                                                                                                                                                                                                                                                                               |
|                                                                          |                     | 30        |                            |        |                                                                                                                                                                                                                                                                                                                                                                                                                                                                                                                                                                                                                                                                                                                                                                                                                                                                                                                                                                                                                                                                                                                                                                                                                                                                                                                                                                                                                                                                                                                                                                                                                                                                                                                                                                                                                                                                                                                                                                                                                                                                                                                                                                                                                                                                                                                                                                                                                                                               |
|                                                                          |                     | 27.5      |                            |        |                                                                                                                                                                                                                                                                                                                                                                                                                                                                                                                                                                                                                                                                                                                                                                                                                                                                                                                                                                                                                                                                                                                                                                                                                                                                                                                                                                                                                                                                                                                                                                                                                                                                                                                                                                                                                                                                                                                                                                                                                                                                                                                                                                                                                                                                                                                                                                                                                                                               |
|                                                                          |                     | 25        |                            |        |                                                                                                                                                                                                                                                                                                                                                                                                                                                                                                                                                                                                                                                                                                                                                                                                                                                                                                                                                                                                                                                                                                                                                                                                                                                                                                                                                                                                                                                                                                                                                                                                                                                                                                                                                                                                                                                                                                                                                                                                                                                                                                                                                                                                                                                                                                                                                                                                                                                               |
|                                                                          |                     | 22.5      |                            |        |                                                                                                                                                                                                                                                                                                                                                                                                                                                                                                                                                                                                                                                                                                                                                                                                                                                                                                                                                                                                                                                                                                                                                                                                                                                                                                                                                                                                                                                                                                                                                                                                                                                                                                                                                                                                                                                                                                                                                                                                                                                                                                                                                                                                                                                                                                                                                                                                                                                               |
|                                                                          |                     | 20        |                            |        |                                                                                                                                                                                                                                                                                                                                                                                                                                                                                                                                                                                                                                                                                                                                                                                                                                                                                                                                                                                                                                                                                                                                                                                                                                                                                                                                                                                                                                                                                                                                                                                                                                                                                                                                                                                                                                                                                                                                                                                                                                                                                                                                                                                                                                                                                                                                                                                                                                                               |
|                                                                          |                     | 17.5      |                            |        |                                                                                                                                                                                                                                                                                                                                                                                                                                                                                                                                                                                                                                                                                                                                                                                                                                                                                                                                                                                                                                                                                                                                                                                                                                                                                                                                                                                                                                                                                                                                                                                                                                                                                                                                                                                                                                                                                                                                                                                                                                                                                                                                                                                                                                                                                                                                                                                                                                                               |
|                                                                          |                     | 15        |                            |        |                                                                                                                                                                                                                                                                                                                                                                                                                                                                                                                                                                                                                                                                                                                                                                                                                                                                                                                                                                                                                                                                                                                                                                                                                                                                                                                                                                                                                                                                                                                                                                                                                                                                                                                                                                                                                                                                                                                                                                                                                                                                                                                                                                                                                                                                                                                                                                                                                                                               |
| 12.5                                                                     |                     |           |                            |        |                                                                                                                                                                                                                                                                                                                                                                                                                                                                                                                                                                                                                                                                                                                                                                                                                                                                                                                                                                                                                                                                                                                                                                                                                                                                                                                                                                                                                                                                                                                                                                                                                                                                                                                                                                                                                                                                                                                                                                                                                                                                                                                                                                                                                                                                                                                                                                                                                                                               |
| 10                                                                       |                     |           |                            |        |                                                                                                                                                                                                                                                                                                                                                                                                                                                                                                                                                                                                                                                                                                                                                                                                                                                                                                                                                                                                                                                                                                                                                                                                                                                                                                                                                                                                                                                                                                                                                                                                                                                                                                                                                                                                                                                                                                                                                                                                                                                                                                                                                                                                                                                                                                                                                                                                                                                               |
| 7.5                                                                      |                     |           |                            |        |                                                                                                                                                                                                                                                                                                                                                                                                                                                                                                                                                                                                                                                                                                                                                                                                                                                                                                                                                                                                                                                                                                                                                                                                                                                                                                                                                                                                                                                                                                                                                                                                                                                                                                                                                                                                                                                                                                                                                                                                                                                                                                                                                                                                                                                                                                                                                                                                                                                               |
| 5                                                                        |                     |           |                            |        |                                                                                                                                                                                                                                                                                                                                                                                                                                                                                                                                                                                                                                                                                                                                                                                                                                                                                                                                                                                                                                                                                                                                                                                                                                                                                                                                                                                                                                                                                                                                                                                                                                                                                                                                                                                                                                                                                                                                                                                                                                                                                                                                                                                                                                                                                                                                                                                                                                                               |
| 2.5                                                                      |                     |           |                            |        |                                                                                                                                                                                                                                                                                                                                                                                                                                                                                                                                                                                                                                                                                                                                                                                                                                                                                                                                                                                                                                                                                                                                                                                                                                                                                                                                                                                                                                                                                                                                                                                                                                                                                                                                                                                                                                                                                                                                                                                                                                                                                                                                                                                                                                                                                                                                                                                                                                                               |
| 0                                                                        |                     |           |                            |        |                                                                                                                                                                                                                                                                                                                                                                                                                                                                                                                                                                                                                                                                                                                                                                                                                                                                                                                                                                                                                                                                                                                                                                                                                                                                                                                                                                                                                                                                                                                                                                                                                                                                                                                                                                                                                                                                                                                                                                                                                                                                                                                                                                                                                                                                                                                                                                                                                                                               |
|                                                                          | REU REU             |           | mud silt sand gravel       |        | -Lenses of clast supported conglomerate, rounded to sub-rounded clasts, pebble to cobble size poorly sorted, clasts of greywacke, jasper, chert, rhyolite and andesite<br><br>-Fine grained sandstone sets, laminated, some wavy laminae, weakly cemented, loosely packed<br><br>-Blue grey siltstone, trace fine grained sand, weakly cemented, massive                                                                                                                                                                                                                                                                                                                                                                                                                                                                                                                                                                                                                                                                                                                                                                                                                                                                                                                                                                                                                                                                                                                                                                                                                                                                                                                                                                                                                                                                                                                                                                                                                                                                                                                                                                                                                                                                                                                                                                                                                                                                                                      |

|                                                                           |                           |             |
|---------------------------------------------------------------------------|---------------------------|-------------|
| Name: Pourewa Stream section                                              | Coordinates (NZTM)        | Elev (masl) |
| Location: Pourewa Stream c. 1.75 km from confluence with Rangitikei River | -40.06349 S, 175.457411 E | 98          |
|                                                                           |                           | 3 of 3      |

| Age              | Formation           | Scale (m) | Grain size |      |      |        | Sample | Comments:                                                                                                                                                                                                                    |
|------------------|---------------------|-----------|------------|------|------|--------|--------|------------------------------------------------------------------------------------------------------------------------------------------------------------------------------------------------------------------------------|
|                  |                     |           | mud        | silt | sand | gravel |        |                                                                                                                                                                                                                              |
| LATE PLEISTOCENE | TOKORANGI FORMATION | 50        |            |      |      |        | BP-267 | -Fine silty sandstone with intercalated siltstone lenses, wavy laminae to lenticular bedding, thin lenses of pumiceous rich material including granule sized pumice clasts, weakly cemented, tightly packed                  |
|                  |                     | 47.5      |            |      |      |        |        | -Coarse grained sandstone with rounded to sub-rounded clasts of greywacke and pumice, cross bedded, weakly cemented, tightly packed                                                                                          |
|                  |                     | 45        |            |      |      |        |        |                                                                                                                                                                                                                              |
|                  |                     | 42.5      |            |      |      |        |        | -Medium to coarse grained sandstone, crossbedded to laminated, lenses of fine granule to small pebble sized clasts of pumice present, weakly cemented, tightly packed                                                        |
|                  |                     | 40        |            |      |      |        |        |                                                                                                                                                                                                                              |
|                  |                     | 37.5      |            |      |      |        |        |                                                                                                                                                                                                                              |
|                  |                     | 35        |            |      |      |        |        | -Fine silty sandstone, massive, some indistinct laminae, sparsely fossiliferous, weakly cemented tightly packed                                                                                                              |
|                  |                     | 32.5      |            |      |      |        |        |                                                                                                                                                                                                                              |
|                  |                     | 30        |            |      |      |        |        | -Condensed shell bed, predominantly crushed shell material within a fine to coarse grained sandstone matrix, cemented                                                                                                        |
|                  |                     | 27.5      |            |      |      |        |        | -Fine silty sandstone, massive, some indistinct laminae, sparsely fossiliferous, weakly cemented tightly packed                                                                                                              |
|                  |                     | 25        |            |      |      |        |        | -Medium grained sandstone, crossbedded to laminated, weakly cemented, sparsely fossiliferous, tightly packed                                                                                                                 |
|                  |                     | 22.5      |            |      |      |        |        |                                                                                                                                                                                                                              |
|                  |                     | 20        |            |      |      |        |        | -Alternating siltstone and medium to coarse grained sandstone beds, sparsely fossiliferous, weakly cemented, tightly packed                                                                                                  |
|                  |                     | 17.5      |            |      |      |        |        |                                                                                                                                                                                                                              |
|                  |                     | 15        |            |      |      |        |        | -Condensed shell bed, matrix supported, fine sandy siltstone with abundant shell material, predominantly preserved whole including insitu <i>Alchithoe arabica</i> , <i>Pecten novaezelandiae</i> and <i>Tanea zelandica</i> |
|                  |                     | 12.5      |            |      |      |        |        | -Fine sandy siltstone, massive, some indistinct laminae, sparsely fossiliferous, predominantly in-situ <i>Alchithoe arabica</i> , <i>Pecten novaezelandiae</i> and <i>Tanea zelandica</i>                                    |
|                  |                     | 10        |            |      |      |        |        | -Normal graded sandstone, coarse to medium grained with basal granule to pebble clasts including shell material, weakly cemented, loosely packed                                                                             |
|                  |                     | 7.5       |            |      |      |        |        |                                                                                                                                                                                                                              |
|                  |                     | 5         |            |      |      |        |        | -Clast supported conglomerate, rounded to sub-rounded pebbles with rare cobbles and abundant <i>Glycymeris modesta</i> preserved whole                                                                                       |
|                  |                     | 2.5       |            |      |      |        |        | -Medium to coarse grained sandstone, planar laminae, trace shell material, weakly cemented, moderately well packed                                                                                                           |
|                  |                     | 0         |            |      |      |        |        | -Blue grey siltstone, wavy to planar laminae, weakly cemented                                                                                                                                                                |

Location: Ridge north of Coutts Creek

-39.924844 S, 175.444193 E

278

1 of 7

| Age              | Formation                 | Scale (m) | Grain size           | Sample | Comments:                                                                                                                      |                                                                                                                                                                                                                           |
|------------------|---------------------------|-----------|----------------------|--------|--------------------------------------------------------------------------------------------------------------------------------|---------------------------------------------------------------------------------------------------------------------------------------------------------------------------------------------------------------------------|
|                  |                           |           | mud silt sand gravel |        |                                                                                                                                |                                                                                                                                                                                                                           |
| LATE PLEISTOCENE | MAKIRIKIRI TUFF FORMATION | 50        |                      |        | -Alternating fine grained sandstone and siltstone lenticular beds, siltstone becoming more frequent upsection, weakly cemented |                                                                                                                                                                                                                           |
|                  |                           | 47.5      |                      |        |                                                                                                                                |                                                                                                                                                                                                                           |
|                  |                           | 45        |                      |        |                                                                                                                                |                                                                                                                                                                                                                           |
|                  |                           | 42.5      |                      |        | CR-57                                                                                                                          | -Matrix supported conglomerate, granule to small pebble sized rounded to sub-rounded clasts within a coarse grained sandstone matrix, abundant pumice clasts, laminae and cross bed sets, weakly cemented, loosely packed |
|                  |                           | 40        |                      |        |                                                                                                                                |                                                                                                                                                                                                                           |
|                  |                           | 37.5      |                      |        |                                                                                                                                | -Crossbedding becoming more frequent up section, normal grading, becoming coarse grained sandstone, with granule to small pebble size clasts of rounded to sub-rounded pumice, weakly cemented, loosely packed            |
|                  |                           | 35        |                      |        |                                                                                                                                |                                                                                                                                                                                                                           |
|                  |                           | 32.5      |                      |        |                                                                                                                                |                                                                                                                                                                                                                           |
|                  |                           | 30        |                      |        |                                                                                                                                | -Medium to coarse grained sandstone with intercalated siltstone lenses, wavy laminae, lenticular and crossbed sets, trace fine granule pumice clasts, weakly cemented, loosely packed                                     |
|                  |                           | 27.5      |                      |        |                                                                                                                                |                                                                                                                                                                                                                           |
|                  |                           | 25        |                      |        |                                                                                                                                |                                                                                                                                                                                                                           |
|                  |                           | 22.5      |                      |        |                                                                                                                                | -Fine to medium grained sandstone with intercalated siltstone lenses, wavy laminae to lenticular bedding, trace fine granule pumice clasts, weakly cemented, loosely packed                                               |
| 20               |                           |           |                      |        |                                                                                                                                |                                                                                                                                                                                                                           |
| 17.5             |                           |           |                      |        |                                                                                                                                |                                                                                                                                                                                                                           |
| 15               |                           |           |                      |        | -Blue grey siltstone, laminated, unfossiliferous, weakly cemented                                                              |                                                                                                                                                                                                                           |
| 12.5             |                           |           |                      |        |                                                                                                                                |                                                                                                                                                                                                                           |
| 10               |                           |           |                      |        |                                                                                                                                |                                                                                                                                                                                                                           |
| 7.5              |                           |           |                      |        | -Blue grey siltstone, massive, weakly cemented                                                                                 |                                                                                                                                                                                                                           |
| 5                |                           |           |                      |        |                                                                                                                                |                                                                                                                                                                                                                           |
| 2.5              |                           |           |                      |        |                                                                                                                                |                                                                                                                                                                                                                           |
| 0                |                           |           |                      |        | -Blue grey siltstone, laminated, weakly cemented                                                                               |                                                                                                                                                                                                                           |
|                  |                           |           | mud silt sand gravel |        |                                                                                                                                |                                                                                                                                                                                                                           |

|                                          |                            |             |
|------------------------------------------|----------------------------|-------------|
| Name: Coutts Creek section               | Coordinates (NZTM)         | Elev (masl) |
| Location: Coutts Creek downstream of hut | -39.935276 S, 175.417628 E | 134         |
|                                          |                            | 2 of 7      |

| Age              | Formation                 | Scale (m) | Grain size |      |      |        | Sample                                                                                                                                                 | Comments:                                                                                                          |                                                                                                                                                                                                                                                                                                                                                                                                                                                                                                                                                                                        |
|------------------|---------------------------|-----------|------------|------|------|--------|--------------------------------------------------------------------------------------------------------------------------------------------------------|--------------------------------------------------------------------------------------------------------------------|----------------------------------------------------------------------------------------------------------------------------------------------------------------------------------------------------------------------------------------------------------------------------------------------------------------------------------------------------------------------------------------------------------------------------------------------------------------------------------------------------------------------------------------------------------------------------------------|
|                  |                           |           | mud        | silt | sand | gravel |                                                                                                                                                        |                                                                                                                    |                                                                                                                                                                                                                                                                                                                                                                                                                                                                                                                                                                                        |
| LATE PLEISTOCENE | REWA FORMATION            | 50        |            |      |      |        |                                                                                                                                                        | -Fine grained sandstone, massive, weakly cemented, loosely packed                                                  |                                                                                                                                                                                                                                                                                                                                                                                                                                                                                                                                                                                        |
|                  |                           | 47.5      |            |      |      |        |                                                                                                                                                        |                                                                                                                    |                                                                                                                                                                                                                                                                                                                                                                                                                                                                                                                                                                                        |
|                  |                           | 45        |            |      |      |        |                                                                                                                                                        |                                                                                                                    |                                                                                                                                                                                                                                                                                                                                                                                                                                                                                                                                                                                        |
|                  |                           | 42.5      |            |      |      |        |                                                                                                                                                        |                                                                                                                    |                                                                                                                                                                                                                                                                                                                                                                                                                                                                                                                                                                                        |
|                  |                           | 40        |            |      |      |        |                                                                                                                                                        |                                                                                                                    |                                                                                                                                                                                                                                                                                                                                                                                                                                                                                                                                                                                        |
|                  |                           | 37.5      |            |      |      |        |                                                                                                                                                        |                                                                                                                    |                                                                                                                                                                                                                                                                                                                                                                                                                                                                                                                                                                                        |
|                  |                           | 35        |            |      |      |        |                                                                                                                                                        |                                                                                                                    |                                                                                                                                                                                                                                                                                                                                                                                                                                                                                                                                                                                        |
|                  |                           | 32.5      |            |      |      |        |                                                                                                                                                        |                                                                                                                    |                                                                                                                                                                                                                                                                                                                                                                                                                                                                                                                                                                                        |
|                  |                           | 30        |            |      |      |        |                                                                                                                                                        |                                                                                                                    |                                                                                                                                                                                                                                                                                                                                                                                                                                                                                                                                                                                        |
|                  |                           | 27.5      |            |      |      |        |                                                                                                                                                        |                                                                                                                    |                                                                                                                                                                                                                                                                                                                                                                                                                                                                                                                                                                                        |
|                  | MAKIRIKIRI TUFF FORMATION | 25        |            |      |      |        |                                                                                                                                                        |                                                                                                                    | -Normal grading, pumice clasts becoming smaller upsection, crossbedding is giving way to laminae sets, coarse to medium grained sandstone, weakly cemented, loosely packed                                                                                                                                                                                                                                                                                                                                                                                                             |
|                  |                           | 22.5      |            |      |      |        |                                                                                                                                                        |                                                                                                                    | -Basal shell conglomerate, matrix supported conglomerate, sub rounded to rounded clasts of greywacke, pumice and rhyolite, abundant crushed shell material (50%) including FAD <i>Mastra</i> ( <i>maorimactra</i> ) <i>carteri</i> , cross bedded to laminated, <i>Mastra carteri</i> , <i>Purpurocardia purpurata</i> , <i>Barbatia novaezelandiae</i> , <i>Maoricrypta profunda</i> , <i>Ostrea chinlensis</i> , <i>Maoricolpus roseus</i> , <i>Tanea zelandica</i> , <i>Paphies australis</i> , <i>Amalda novaezelandiae</i> , <i>Cominella</i> sp. weakly cemented, loosely packed |
|                  |                           | 20        |            |      |      |        |                                                                                                                                                        |                                                                                                                    | -Fine to medium grained sandstone, laminated, lenses of small pebble to granule size pumice clasts present, weakly cemented, loosely packed                                                                                                                                                                                                                                                                                                                                                                                                                                            |
|                  |                           | 17.5      |            |      |      |        |                                                                                                                                                        |                                                                                                                    | -Blue grey siltstone, massive, uncemented                                                                                                                                                                                                                                                                                                                                                                                                                                                                                                                                              |
|                  |                           | 15        |            |      |      |        |                                                                                                                                                        |                                                                                                                    |                                                                                                                                                                                                                                                                                                                                                                                                                                                                                                                                                                                        |
|                  |                           | 12.5      |            |      |      |        |                                                                                                                                                        |                                                                                                                    | -Fine sandstone lenses becoming more frequent upsection, lenticular to flaser beds, lenses of siltstone and fine to medium grained sandstone, weakly cemented, tightly packed                                                                                                                                                                                                                                                                                                                                                                                                          |
|                  |                           | 10        |            |      |      |        |                                                                                                                                                        |                                                                                                                    |                                                                                                                                                                                                                                                                                                                                                                                                                                                                                                                                                                                        |
|                  |                           | 7.5       |            |      |      |        |                                                                                                                                                        |                                                                                                                    | -Fine sandy siltstone and very fine sandstone beds, lenticular and flaser beds, unfossiliferous, weakly cemented                                                                                                                                                                                                                                                                                                                                                                                                                                                                       |
| 5                |                           |           |            |      |      |        | -Coarse grained sandstone, crossbedded, small pebble to granule clasts of rounded to sub-rounded greywacke and pumice, weakly cemented, loosely packed |                                                                                                                    |                                                                                                                                                                                                                                                                                                                                                                                                                                                                                                                                                                                        |
| 2.5              |                           |           |            |      |      |        |                                                                                                                                                        | -Alternating fine sandy siltstone and siltstone beds, lenticular and flaser beds, unfossiliferous, weakly cemented |                                                                                                                                                                                                                                                                                                                                                                                                                                                                                                                                                                                        |
| 0                |                           |           |            |      |      |        |                                                                                                                                                        |                                                                                                                    |                                                                                                                                                                                                                                                                                                                                                                                                                                                                                                                                                                                        |

| Name: Coutts Creek section            |                |           | Coordinates (NZTM)                                                                 |      | Elev (masl) |        |        |                                                |  |                                                                                                                                                                              |
|---------------------------------------|----------------|-----------|------------------------------------------------------------------------------------|------|-------------|--------|--------|------------------------------------------------|--|------------------------------------------------------------------------------------------------------------------------------------------------------------------------------|
| Location: Ridge south of Coutts Creek |                |           | -39.938468 S, 175.426254 E                                                         |      | 182         |        |        |                                                |  |                                                                                                                                                                              |
|                                       |                |           |                                                                                    |      | 3 of 7      |        |        |                                                |  |                                                                                                                                                                              |
| Age                                   | Formation      | Scale (m) | Grain size                                                                         |      |             |        | Sample | Comments:                                      |  |                                                                                                                                                                              |
|                                       |                |           | mud                                                                                | silt | sand        | gravel |        |                                                |  |                                                                                                                                                                              |
| LATE PLEISTOCENE                      | REWA FORMATION | 50        | 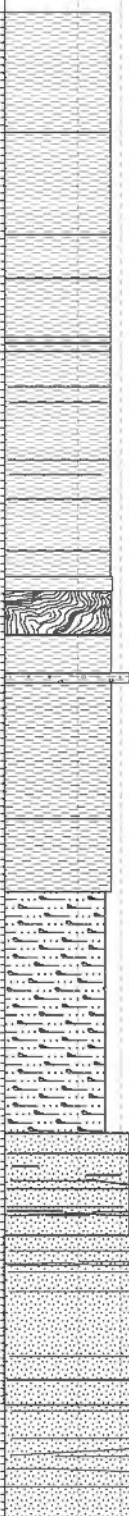 |      |             |        | CR-54  | -Blue grey siltstone, massive, weakly cemented |  |                                                                                                                                                                              |
|                                       |                | 47.5      |                                                                                    |      |             |        |        |                                                |  |                                                                                                                                                                              |
|                                       |                | 45        |                                                                                    |      |             |        |        |                                                |  |                                                                                                                                                                              |
|                                       |                | 42.5      |                                                                                    |      |             |        |        |                                                |  |                                                                                                                                                                              |
|                                       |                | 40        |                                                                                    |      |             |        |        |                                                |  | -Blue grey siltstone sets, massive to indistinct laminae sets, weakly cemented                                                                                               |
|                                       |                | 37.5      |                                                                                    |      |             |        |        |                                                |  |                                                                                                                                                                              |
|                                       |                | 35        |                                                                                    |      |             |        |        |                                                |  |                                                                                                                                                                              |
|                                       |                | 32.5      |                                                                                    |      |             |        |        |                                                |  | -Blue grey siltstone, massive, weakly cemented                                                                                                                               |
|                                       |                | 30        |                                                                                    |      |             |        |        |                                                |  | -Water escape structures present, wavy, discontinuous, formed in fine grained siltstone with trace fine frained sandstone, weakly cemented                                   |
|                                       |                | 27.5      |                                                                                    |      |             |        |        |                                                |  | -Blue grey siltstone, massive, weakly cemented                                                                                                                               |
|                                       |                | 25        |                                                                                    |      |             |        |        |                                                |  | -Pumiceous horizon, includes moderate amounts of sub rounded to rounded clasts of small to medium pebble size, unit composed predominantly of tephric silts, weakly cemented |
|                                       |                | 22.5      |                                                                                    |      |             |        |        |                                                |  | -Blue grey siltstone sets, massive, weakly cemented                                                                                                                          |
|                                       |                | 20        |                                                                                    |      |             |        |        |                                                |  |                                                                                                                                                                              |
|                                       |                | 17.5      |                                                                                    |      |             |        |        |                                                |  | -Siltstone and very fine sandy siltstone interbeds, lenticular to flaser bedding, weakly cemented                                                                            |
|                                       |                | 15        |                                                                                    |      |             |        |        |                                                |  |                                                                                                                                                                              |
|                                       |                | 12.5      |                                                                                    |      |             |        |        |                                                |  |                                                                                                                                                                              |
|                                       |                | 10        |                                                                                    |      |             |        |        |                                                |  |                                                                                                                                                                              |
|                                       |                | 7.5       |                                                                                    |      |             |        |        |                                                |  | -Fine grained sandstone and intercalated siltstone lenses, laminated to lenticular bedding, trace round to sub-rounded pumice clasts, weakly cemented, tightly packed        |
|                                       |                | 5         |                                                                                    |      |             |        |        |                                                |  |                                                                                                                                                                              |
|                                       |                | 2.5       |                                                                                    |      |             |        |        |                                                |  | -Some crossbeds and wavy laminae present, trace granule to small pebble sized round to sub-rounded pumice clasts                                                             |
|                                       |                | 0         |                                                                                    |      |             |        |        |                                                |  |                                                                                                                                                                              |
|                                       |                |           | mud                                                                                | silt | sand        | gravel |        |                                                |  |                                                                                                                                                                              |

| Name: Coutts Creek section        |                |           | Coordinates (NZTM)         |        | Elev (masl)                                                                                                                                                                                                                                                                                              |
|-----------------------------------|----------------|-----------|----------------------------|--------|----------------------------------------------------------------------------------------------------------------------------------------------------------------------------------------------------------------------------------------------------------------------------------------------------------|
| Location: Section up Ngaruru Road |                |           | -39.943107 S, 175.402522 E |        | 99                                                                                                                                                                                                                                                                                                       |
|                                   |                |           |                            |        | 4 of 7                                                                                                                                                                                                                                                                                                   |
| Age                               | Formation      | Scale (m) | Grain size                 | Sample | Comments:                                                                                                                                                                                                                                                                                                |
|                                   |                |           | mud silt sand gravel       |        |                                                                                                                                                                                                                                                                                                          |
| LATE PLEISTOCENE                  | REWA FORMATION | 50        |                            | CR-53  | -Alternating sets of fine silty sandstone and siltstone, lenticular and flaser bedding, weakly cemented                                                                                                                                                                                                  |
|                                   |                | 47.5      |                            |        |                                                                                                                                                                                                                                                                                                          |
|                                   |                | 45        |                            |        | -Coarse to medium grained sandstone with abundant rounded to sub-rounded pumice clasts, small pebble to granule in size, cross bedded, weakly cemented, loosely packed                                                                                                                                   |
|                                   |                | 42.5      |                            |        | -Alternating sets of fine silty sandstone and siltstone, lenticular and flaser bedding, weakly cemented                                                                                                                                                                                                  |
|                                   |                | 40        |                            |        | -Blue grey siltstone, massive, weakly cemented                                                                                                                                                                                                                                                           |
|                                   |                | 37.5      |                            |        |                                                                                                                                                                                                                                                                                                          |
|                                   |                | 35        |                            |        | -Heterolithic sets of fine to medium grained silty sandstone and siltstone, lenticular bedding and flaser bedding, normal grading with siltstone becoming predominant up section, flasers highlighted by thin lenses of granule pumice clasts, zones of indistinct bioturbation present, weakly cemented |
|                                   |                | 32.5      |                            |        |                                                                                                                                                                                                                                                                                                          |
|                                   |                | 30        |                            |        | -Coarse to medium grained sandstone, crossbedded, granule to small pebble sized pumice clasts, rounded to sub-rounded, discontinuous silt lenses, weakly cemented, loosely packed                                                                                                                        |
|                                   |                | 27.5      |                            |        | -Alternating sets of fine silty sandstone and siltstone, lenticular and flaser bedding, granules of pumice present, weakly cemented                                                                                                                                                                      |
|                                   |                | 25        |                            |        | -Coarse to medium grained sandstone, crossbedded, granule pumice clasts and silt lenses                                                                                                                                                                                                                  |
|                                   |                | 22.5      |                            |        | -Normal graded heterolithic sets of fine to coarse silty sandstone and siltstone, lenticular and flaser bedding, some bioturbation present, weakly cemented                                                                                                                                              |
|                                   |                | 20        |                            |        | -Coarse to medium grained sandstone, crossbedded, discontinuous silt lenses, granule to small pebble sized rounded to sub-rounded pumice clasts, weakly cemented, loosely packed                                                                                                                         |
|                                   |                | 17.5      |                            |        | -Heterolithic sets of fine to coarse silty sandstone and siltstone, lenticular and flaser bedding, vertical burrows present 20-100 mm long infilled with siltstone, weakly cemented                                                                                                                      |
|                                   |                | 15        |                            |        | -Alternating sets of fine silty sandstone and siltstone, lenticular and flaser bedding, laminated, trace rounded pumice granules, weakly cemented                                                                                                                                                        |
|                                   |                | 12.5      |                            |        | -Coarse to medium grained sandstone, crossbedded, granule pumice clasts and silt lenses                                                                                                                                                                                                                  |
|                                   |                | 10        |                            |        | -Heterolithic sets of fine silty sandstone and siltstone, lenticular bedding and laminae, weakly cemented                                                                                                                                                                                                |
|                                   |                | 7.5       |                            |        | -Coarse to medium grained sandstone, crossbedded with discontinuous silt lenses and pumice                                                                                                                                                                                                               |
|                                   |                | 5         |                            |        | -Alternating sets of fine silty sandstone and siltstone, lenticular bedding and laminae, weakly cemented                                                                                                                                                                                                 |
|                                   |                | 2.5       |                            |        | -Coarse to medium grained sandstone, crossbedded, granule pumice clasts and silt lenses                                                                                                                                                                                                                  |
|                                   |                | 0         |                            |        | -Heterolithic sets of fine silty sandstone and siltstone, lenticular and flaser bedding, lenses of pumice granules and coarse sand, weakly cemented                                                                                                                                                      |
|                                   |                |           |                            |        | -Coarse to medium grained sandstone with rounded to sub-rounded clasts of pumice and trace greywacke, crossbedded, lenses of intercalated siltstone, weakly cemented, loosely packed                                                                                                                     |
|                                   |                |           |                            |        | -Alternating sets of fine silty sandstone and siltstone, lenticular bedding and laminae, weakly cemented                                                                                                                                                                                                 |
|                                   |                |           |                            |        |                                                                                                                                                                                                                                                                                                          |
|                                   |                |           |                            |        | -Blue grey siltstone, massive, weakly cemented                                                                                                                                                                                                                                                           |
|                                   |                |           | mud silt sand gravel       |        |                                                                                                                                                                                                                                                                                                          |

| Name: Coutts Creek section               |                |           | Coordinates (NZTM)         |        | Elev (masl)                                                                                                                                                                                                                                                                                                                                                                                                    |                                                                                                                                                                                                                                                                                           |
|------------------------------------------|----------------|-----------|----------------------------|--------|----------------------------------------------------------------------------------------------------------------------------------------------------------------------------------------------------------------------------------------------------------------------------------------------------------------------------------------------------------------------------------------------------------------|-------------------------------------------------------------------------------------------------------------------------------------------------------------------------------------------------------------------------------------------------------------------------------------------|
| Location: Section at top of Ngaruru Road |                |           | -39.956267 S, 175.399475 E |        | 219                                                                                                                                                                                                                                                                                                                                                                                                            |                                                                                                                                                                                                                                                                                           |
|                                          |                |           |                            |        | 5 of 7                                                                                                                                                                                                                                                                                                                                                                                                         |                                                                                                                                                                                                                                                                                           |
| Age                                      | Formation      | Scale (m) | Grain size                 | Sample | Comments:                                                                                                                                                                                                                                                                                                                                                                                                      |                                                                                                                                                                                                                                                                                           |
|                                          |                |           | mud   silt   sand   gravel |        |                                                                                                                                                                                                                                                                                                                                                                                                                |                                                                                                                                                                                                                                                                                           |
| LATE PLEISTOCENE                         | REWA FORMATION | 50        |                            |        | -Shell bed, abundant crushed shell material together with rounded to sub-rounded clasts of greywacke, small pebble to granule in size, <i>Barbatia novaezelandiae</i> , <i>Talochlamys gemmulata</i> , <i>Maoricolpus roseus</i> , <i>Ostrea chilensis</i> , <i>Purpurocardia purpurata</i> , and <i>Cyclomactra tristis</i> , whole fossils comprise 30% of shellbed, weakly cemented, moderately well packed |                                                                                                                                                                                                                                                                                           |
|                                          |                | 47.5      |                            |        | -Heterolithic beds of alternating fine silty sandstone and siltstone, laminated, siltstone contains wavy laminae, weakly cemented, sandstones are loosely packed                                                                                                                                                                                                                                               |                                                                                                                                                                                                                                                                                           |
|                                          |                | 45        |                            |        |                                                                                                                                                                                                                                                                                                                                                                                                                |                                                                                                                                                                                                                                                                                           |
|                                          |                | 42.5      |                            |        |                                                                                                                                                                                                                                                                                                                                                                                                                |                                                                                                                                                                                                                                                                                           |
|                                          |                | 40        |                            |        |                                                                                                                                                                                                                                                                                                                                                                                                                |                                                                                                                                                                                                                                                                                           |
|                                          |                | 37.5      |                            |        |                                                                                                                                                                                                                                                                                                                                                                                                                | -Blue grey siltstone, wavy laminae, weakly cemented                                                                                                                                                                                                                                       |
|                                          |                | 35        |                            |        |                                                                                                                                                                                                                                                                                                                                                                                                                |                                                                                                                                                                                                                                                                                           |
|                                          |                | 32.5      |                            |        |                                                                                                                                                                                                                                                                                                                                                                                                                | -Coarse to fine grained sandstone, planar laminae, normal grading, trace granule pumice clasts, weakly cemented, loosely packed                                                                                                                                                           |
|                                          |                | 30        |                            |        |                                                                                                                                                                                                                                                                                                                                                                                                                |                                                                                                                                                                                                                                                                                           |
|                                          |                | 27.5      |                            |        |                                                                                                                                                                                                                                                                                                                                                                                                                | -Clast supported conglomerate becoming matrix supported upsection, abundant pumice clasts, rounded to sub-rounded, large pebble to granule in size, normal grading, rich in volcaniclastics, crossbedded progressing to indistinct lamination up section, weakly cemented, loosely packed |
|                                          |                | 25        |                            |        |                                                                                                                                                                                                                                                                                                                                                                                                                |                                                                                                                                                                                                                                                                                           |
|                                          |                | 22.5      |                            |        |                                                                                                                                                                                                                                                                                                                                                                                                                |                                                                                                                                                                                                                                                                                           |
|                                          |                | 20        |                            |        |                                                                                                                                                                                                                                                                                                                                                                                                                |                                                                                                                                                                                                                                                                                           |
|                                          |                | 17.5      |                            |        |                                                                                                                                                                                                                                                                                                                                                                                                                |                                                                                                                                                                                                                                                                                           |
|                                          |                | 15        |                            |        |                                                                                                                                                                                                                                                                                                                                                                                                                | -Blue grey siltstone, massive, weakly cemented                                                                                                                                                                                                                                            |
|                                          |                | 12.5      |                            |        |                                                                                                                                                                                                                                                                                                                                                                                                                |                                                                                                                                                                                                                                                                                           |
|                                          |                | 10        |                            |        |                                                                                                                                                                                                                                                                                                                                                                                                                |                                                                                                                                                                                                                                                                                           |
|                                          |                | 7.5       |                            |        |                                                                                                                                                                                                                                                                                                                                                                                                                |                                                                                                                                                                                                                                                                                           |
|                                          |                | 5         |                            |        |                                                                                                                                                                                                                                                                                                                                                                                                                |                                                                                                                                                                                                                                                                                           |
|                                          |                | 2.5       |                            |        |                                                                                                                                                                                                                                                                                                                                                                                                                | -Alternating sets of fine silty sandstone and siltstone, lenticular and flaser bedding, weakly cemented                                                                                                                                                                                   |
|                                          |                | 0         |                            |        |                                                                                                                                                                                                                                                                                                                                                                                                                |                                                                                                                                                                                                                                                                                           |
|                                          |                |           | mud   silt   sand   gravel |        |                                                                                                                                                                                                                                                                                                                                                                                                                |                                                                                                                                                                                                                                                                                           |

|                                           |                            |             |
|-------------------------------------------|----------------------------|-------------|
| Name: Coutts Creek section                | Coordinates (NZTM)         | Elev (masl) |
| Location: Section at base of Galpins Road | -39.958701 S, 175.399904 E | 234         |
|                                           |                            | 6 of 7      |

| Age              | Formation                       | Scale (m) | Grain size<br>mud   silt   sand   gravel | Sample | Comments:                                                                                                                                                                                                                        |
|------------------|---------------------------------|-----------|------------------------------------------|--------|----------------------------------------------------------------------------------------------------------------------------------------------------------------------------------------------------------------------------------|
| LATE PLEISTOCENE | KAIMATIRA PUMICE SAND FORMATION | 50        |                                          | CR-32  | -Hetrolithic sets of fine silty sandstone and siltstone, lenticular and flaser bedding, weakly cemented<br>-Coarse grained sandstone bed, laminated                                                                              |
|                  | KAIMATIRA PUMICE SAND FORMATION | 47.5      |                                          |        | -Hetrolithic sets of fine silty sandstone and siltstone, lenticular bedding and laminae, occasional lenses of pumice granules, weakly cemented                                                                                   |
|                  | KAIMATIRA PUMICE SAND FORMATION | 45        |                                          |        | -Coarse grained sandstone beds with pebble to granule sized pumice clasts, rounded to sub-rounded, laminated, weakly cemented, loosely packed                                                                                    |
|                  | KAIMATIRA PUMICE SAND FORMATION | 42.5      |                                          |        | -Hetrolithic sets of fine silty sandstone and siltstone, lenticular bedding and laminae, weakly cemented                                                                                                                         |
|                  | KAIMATIRA PUMICE SAND FORMATION | 40        |                                          |        | -Coarse grained sandstone beds with pebble to granule sized pumice clasts, rounded to sub-rounded, crossbedded, weakly cemented, loosely packed                                                                                  |
|                  | KAIMATIRA PUMICE SAND FORMATION | 37.5      |                                          |        | -Reverse graded coarse to medium grained sandstone beds with increasing abundance of pebble to granule sized pumice clasts, rounded to sub-rounded, indistinct laminae, weakly cemented, loosely packed                          |
|                  | KAIMATIRA PUMICE SAND FORMATION | 35        |                                          |        | -Coarse grained sandstone with abundant large pebble to granule sized pumice clasts, rounded to sub-rounded, sparse greywacke clasts, crossbedded, discontinuous lenses of siltstone throughout, weakly cemented, loosely packed |
|                  | KAIMATIRA PUMICE SAND FORMATION | 32.5      |                                          |        | -Reverse graded coarse to medium grained sandstone beds with increasing abundance of pebble to granule sized pumice clasts, rounded to sub-rounded, indistinct laminae, weakly cemented, loosely packed                          |
|                  | KAIMATIRA PUMICE SAND FORMATION | 30        |                                          |        | -Coarse grained sandstone with abundant large pebble to granule sized pumice clasts, rounded to sub-rounded, sparse greywacke clasts, crossbedded, discontinuous lenses of siltstone throughout, weakly cemented, loosely packed |
|                  | KAIMATIRA PUMICE SAND FORMATION | 27.5      |                                          |        | -Reverse graded coarse to medium grained sandstone beds with increasing abundance of pebble to granule sized pumice clasts, rounded to sub-rounded, indistinct laminae, weakly cemented, loosely packed                          |
|                  | KAIMATIRA PUMICE SAND FORMATION | 25        |                                          |        | -Blue grey siltstone, massive, weakly cemented                                                                                                                                                                                   |
|                  | KAIMATIRA PUMICE SAND FORMATION | 22.5      |                                          |        |                                                                                                                                                                                                                                  |
|                  | KAIMATIRA PUMICE SAND FORMATION | 20        |                                          |        |                                                                                                                                                                                                                                  |
|                  | KAIMATIRA PUMICE SAND FORMATION | 17.5      |                                          |        |                                                                                                                                                                                                                                  |
|                  | KAIMATIRA PUMICE SAND FORMATION | 15        |                                          |        |                                                                                                                                                                                                                                  |
|                  | KAIMATIRA PUMICE SAND FORMATION | 12.5      |                                          |        |                                                                                                                                                                                                                                  |
|                  | KAIMATIRA PUMICE SAND FORMATION | 10        |                                          |        |                                                                                                                                                                                                                                  |
|                  | KAIMATIRA PUMICE SAND FORMATION | 7.5       |                                          |        |                                                                                                                                                                                                                                  |
|                  | KAIMATIRA PUMICE SAND FORMATION | 5         |                                          |        |                                                                                                                                                                                                                                  |
|                  | KAIMATIRA PUMICE SAND FORMATION | 2.5       |                                          |        |                                                                                                                                                                                                                                  |
|                  | KAIMATIRA PUMICE SAND FORMATION | 0         |                                          |        |                                                                                                                                                                                                                                  |
|                  | REWA FORMATION                  |           |                                          |        |                                                                                                                                                                                                                                  |

|                                              |                            |             |
|----------------------------------------------|----------------------------|-------------|
| Name: Coutts Creek section                   | Coordinates (NZTM)         | Elev (masl) |
| Location: Section at the top of Galpins Road | -39.960872 S, 175.405226 E | 273         |
|                                              |                            | 7 of 7      |

| Age              | Formation                       | Scale (m) | Grain size |      |      |        | Sample /Wp | Comments:                                                                                                                                                                                                     |
|------------------|---------------------------------|-----------|------------|------|------|--------|------------|---------------------------------------------------------------------------------------------------------------------------------------------------------------------------------------------------------------|
|                  |                                 |           | mud        | silt | sand | gravel |            |                                                                                                                                                                                                               |
| LATE PLEISTOCENE | KAIMATIRA PUMICE SAND FORMATION | 50        |            |      |      |        |            |                                                                                                                                                                                                               |
|                  |                                 | 47.5      |            |      |      |        |            |                                                                                                                                                                                                               |
|                  |                                 | 45        |            |      |      |        |            | -Blue grey siltstone, massive, weakly cemented                                                                                                                                                                |
|                  |                                 | 42.5      |            |      |      |        |            |                                                                                                                                                                                                               |
|                  |                                 | 40        |            |      |      |        |            | -Fine grained sandstone, weakly cemented, tightly packed                                                                                                                                                      |
|                  |                                 | 37.5      |            |      |      |        |            | -Blue grey siltstone, massive, weakly cemented                                                                                                                                                                |
|                  |                                 | 35        |            |      |      |        |            | -Fine grained sandstone, weakly cemented, tightly packed                                                                                                                                                      |
|                  |                                 | 32.5      |            |      |      |        |            | -Blue grey siltstone, massive, weakly cemented                                                                                                                                                                |
|                  |                                 | 30        |            |      |      |        |            |                                                                                                                                                                                                               |
|                  |                                 | 27.5      |            |      |      |        |            | -Blue grey siltstone, massive, with occasional lenses of fine grained sandstone, weakly cemented                                                                                                              |
|                  |                                 | 25        |            |      |      |        |            |                                                                                                                                                                                                               |
|                  |                                 | 22.5      |            |      |      |        |            | -Alternating massive and wavy laminae sets of blue grey siltstone, occasional lenses of fine sandstone, weakly cemented                                                                                       |
|                  |                                 | 20        |            |      |      |        |            |                                                                                                                                                                                                               |
|                  |                                 | 17.5      |            |      |      |        | CR-31      | -Fine grained sandstone, laminated, with small pebble to granule clasts of pumice, rounded to sub-rounded, weakly cemented, tightly packed                                                                    |
|                  |                                 | 15        |            |      |      |        |            | -Blue grey siltstone beds, wavy laminae, weakly cemented                                                                                                                                                      |
|                  |                                 | 12.5      |            |      |      |        |            | -Water escape structures and convolute bedding                                                                                                                                                                |
|                  |                                 | 10        |            |      |      |        |            | -Blue grey siltstone, wavy laminae, weakly cemented                                                                                                                                                           |
|                  |                                 | 7.5       |            |      |      |        |            | -Obscured                                                                                                                                                                                                     |
|                  |                                 | 5         |            |      |      |        |            |                                                                                                                                                                                                               |
|                  |                                 | 2.5       |            |      |      |        |            | -Heterolithic sets of fine to coarse sandstone with lenses of granule sized pumice clasts and intercalated siltstone, clasts are rounded to sub-rounded, laminated with some cross lamination weakly cemented |
|                  |                                 | 0         |            |      |      |        |            |                                                                                                                                                                                                               |
|                  |                                 |           | mud        | silt | sand | gravel |            |                                                                                                                                                                                                               |

| Name: Beaconsfield section              |                |           |                            | Coordinates (NZTM)         | Elev (masl)                                                                                                                                                                                                                                                                                                                                                                                                                                                                         |                                                                                                                                                                                                                                                                                                                                                                                                                                                                                                                                                                                                                          |
|-----------------------------------------|----------------|-----------|----------------------------|----------------------------|-------------------------------------------------------------------------------------------------------------------------------------------------------------------------------------------------------------------------------------------------------------------------------------------------------------------------------------------------------------------------------------------------------------------------------------------------------------------------------------|--------------------------------------------------------------------------------------------------------------------------------------------------------------------------------------------------------------------------------------------------------------------------------------------------------------------------------------------------------------------------------------------------------------------------------------------------------------------------------------------------------------------------------------------------------------------------------------------------------------------------|
| Location: Kiwitea Stream near Dick Road |                |           |                            | -40.004476 S, 175.758247 E | 340                                                                                                                                                                                                                                                                                                                                                                                                                                                                                 |                                                                                                                                                                                                                                                                                                                                                                                                                                                                                                                                                                                                                          |
|                                         |                |           |                            |                            | 1 of 10                                                                                                                                                                                                                                                                                                                                                                                                                                                                             |                                                                                                                                                                                                                                                                                                                                                                                                                                                                                                                                                                                                                          |
| Age                                     | Formation      | Scale (m) | Grain size                 | Sample                     | Comments:                                                                                                                                                                                                                                                                                                                                                                                                                                                                           |                                                                                                                                                                                                                                                                                                                                                                                                                                                                                                                                                                                                                          |
|                                         |                |           | mud   silt   sand   gravel |                            |                                                                                                                                                                                                                                                                                                                                                                                                                                                                                     |                                                                                                                                                                                                                                                                                                                                                                                                                                                                                                                                                                                                                          |
| LATE PLEISTOCENE                        | REWA FORMATION | 50        |                            |                            | -Matrix supported shell conglomerate bed, granule to small pebble sized rounded to sub-rounded clasts of pumice and greywacke within a coarse grained sandstone to granule matrix, predominantly crushed shell material, <i>Paphies australis</i> , <i>Talochlamys gemmulata</i> , <i>Ostrea chilensis</i> , <i>Purpurocardia purpurata</i> , <i>Mactra (maorimactra) carteri</i> , cross bed sets, intercalated fine sandstone and siltstone beds, weakly cemented, loosely packed |                                                                                                                                                                                                                                                                                                                                                                                                                                                                                                                                                                                                                          |
|                                         |                | 47.5      |                            |                            | -Fine silty sandstone beds, laminated, weakly cemented, loosely packed                                                                                                                                                                                                                                                                                                                                                                                                              |                                                                                                                                                                                                                                                                                                                                                                                                                                                                                                                                                                                                                          |
|                                         |                | 45        |                            |                            |                                                                                                                                                                                                                                                                                                                                                                                                                                                                                     |                                                                                                                                                                                                                                                                                                                                                                                                                                                                                                                                                                                                                          |
|                                         |                | 42.5      |                            |                            |                                                                                                                                                                                                                                                                                                                                                                                                                                                                                     |                                                                                                                                                                                                                                                                                                                                                                                                                                                                                                                                                                                                                          |
|                                         |                | 40        |                            |                            |                                                                                                                                                                                                                                                                                                                                                                                                                                                                                     | -Fine to medium grained sandstone beds, crossbedded to laminated, weakly cemented, loosely packed                                                                                                                                                                                                                                                                                                                                                                                                                                                                                                                        |
|                                         |                | 37.5      |                            |                            |                                                                                                                                                                                                                                                                                                                                                                                                                                                                                     | -Fine to medium grained silty sandstone and siltstone flaser and lenticular sets, weakly cemented                                                                                                                                                                                                                                                                                                                                                                                                                                                                                                                        |
|                                         |                | 35        |                            |                            |                                                                                                                                                                                                                                                                                                                                                                                                                                                                                     | -Fine silty sandstone bed, crossbedded to laminated, weakly cemented, loosely packed                                                                                                                                                                                                                                                                                                                                                                                                                                                                                                                                     |
|                                         |                | 32.5      |                            |                            |                                                                                                                                                                                                                                                                                                                                                                                                                                                                                     | -Fine to medium grained silty sandstone and siltstone flaser and lenticular sets, weakly cemented                                                                                                                                                                                                                                                                                                                                                                                                                                                                                                                        |
|                                         |                | 30        |                            |                            |                                                                                                                                                                                                                                                                                                                                                                                                                                                                                     | -Fine silty sandstone bed, crossbedded to laminated, some discontinuous lenses of siltstone, weakly cemented, loosely packed                                                                                                                                                                                                                                                                                                                                                                                                                                                                                             |
|                                         |                | 27.5      |                            |                            |                                                                                                                                                                                                                                                                                                                                                                                                                                                                                     | -Fine silty sandstone and siltstone flaser and lenticular sets, weakly cemented                                                                                                                                                                                                                                                                                                                                                                                                                                                                                                                                          |
|                                         |                | 25        |                            |                            |                                                                                                                                                                                                                                                                                                                                                                                                                                                                                     |                                                                                                                                                                                                                                                                                                                                                                                                                                                                                                                                                                                                                          |
|                                         |                | 22.5      |                            |                            |                                                                                                                                                                                                                                                                                                                                                                                                                                                                                     | -Blue grey siltstone, massive, weakly cemented                                                                                                                                                                                                                                                                                                                                                                                                                                                                                                                                                                           |
|                                         |                | 20        |                            |                            |                                                                                                                                                                                                                                                                                                                                                                                                                                                                                     |                                                                                                                                                                                                                                                                                                                                                                                                                                                                                                                                                                                                                          |
|                                         |                | 17.5      |                            |                            |                                                                                                                                                                                                                                                                                                                                                                                                                                                                                     | -Matrix supported shell conglomerate bed, granule to small pebble sized rounded to sub-rounded clasts of pumice and greywacke within a coarse grained sandstone to granule matrix, <i>Paphies australis</i> , <i>Barbatia novaezealandiae</i> , <i>Talochlamys gemmulata</i> , <i>Maoricolpus roseus</i> , <i>Ostrea chilensis</i> , <i>Barnea similis</i> , <i>Alcithoe fusus</i> , <i>Amalda novaezealandiae</i> , <i>Purpurocardia purpurata</i> , <i>Cyclomactra tristis</i> , <i>Mactra (maorimactra) carteri</i> , cross bed sets, intercalated fine sandstone and siltstone beds, weakly cemented, loosely packed |
|                                         |                | 15        |                            |                            |                                                                                                                                                                                                                                                                                                                                                                                                                                                                                     | -Blue grey siltstone, laminated, weakly cemented                                                                                                                                                                                                                                                                                                                                                                                                                                                                                                                                                                         |
|                                         |                | 12.5      |                            |                            |                                                                                                                                                                                                                                                                                                                                                                                                                                                                                     | -Shell conglomerate bed, abundant crushed shell material together with small pebble to granule sized rounded to sub-rounded pumice and greywacke clasts, weakly cemented, loosely packed                                                                                                                                                                                                                                                                                                                                                                                                                                 |
|                                         |                | 10        |                            |                            |                                                                                                                                                                                                                                                                                                                                                                                                                                                                                     | -Blue grey siltstone, laminated, weakly cemented                                                                                                                                                                                                                                                                                                                                                                                                                                                                                                                                                                         |
|                                         |                | 7.5       |                            |                            |                                                                                                                                                                                                                                                                                                                                                                                                                                                                                     | -Matrix supported shell conglomerate beds with granule to small pebble sized rounded to sub-rounded clasts of pumice and greywacke within a coarse grained sandstone to granule matrix, abundant crushed shell material, <i>Barbatia novaezealandiae</i> , <i>Talochlamys gemmulata</i> , <i>Maoricolpus roseus</i> , <i>Ostrea chilensis</i> , <i>Purpurocardia purpurata</i> , <i>Cyclomactra tristis</i> , <i>Mactra (maorimactra) carteri</i> , laminae and cross bed sets, intercalated fine sandstone and siltstone beds, weakly cemented,                                                                         |
|                                         |                | 5         |                            |                            |                                                                                                                                                                                                                                                                                                                                                                                                                                                                                     |                                                                                                                                                                                                                                                                                                                                                                                                                                                                                                                                                                                                                          |
|                                         |                | 2.5       |                            |                            |                                                                                                                                                                                                                                                                                                                                                                                                                                                                                     | -Heterolithic beds of fine silty sandstone and siltstone, laminated, weakly cemented                                                                                                                                                                                                                                                                                                                                                                                                                                                                                                                                     |
|                                         |                | 0         |                            |                            |                                                                                                                                                                                                                                                                                                                                                                                                                                                                                     | -Blue grey siltstone, massive, weakly cemented                                                                                                                                                                                                                                                                                                                                                                                                                                                                                                                                                                           |
|                                         |                |           | mud   silt   sand   gravel |                            |                                                                                                                                                                                                                                                                                                                                                                                                                                                                                     |                                                                                                                                                                                                                                                                                                                                                                                                                                                                                                                                                                                                                          |

Name: Beaconsfield section

Coordinates (NZTM)

Elev (masl)

Location: Kiwitea Stream, Potaka Cliffs

-40.026431 S, 175.739794 E

300

2 of 10

| Age              | Formation        | Scale (m)                                                                          | Grain size |                                                                                                                                                                                                                                                                                                                                                                                                                                                                                                                              |      |        | Sample | Comments: |
|------------------|------------------|------------------------------------------------------------------------------------|------------|------------------------------------------------------------------------------------------------------------------------------------------------------------------------------------------------------------------------------------------------------------------------------------------------------------------------------------------------------------------------------------------------------------------------------------------------------------------------------------------------------------------------------|------|--------|--------|-----------|
|                  |                  |                                                                                    | mud        | silt                                                                                                                                                                                                                                                                                                                                                                                                                                                                                                                         | sand | gravel |        |           |
| LATE PLEISTOCENE | KAIMATIRA PUMICE | 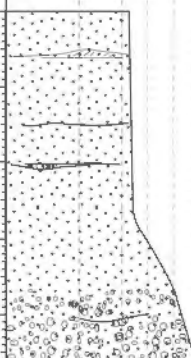  | CR-66      | <p>-Pumiceous silty sandstone, massive with isolated ripples containing granules of pumice, weakly cemented, tightly packed</p> <p>-Pumiceous rich unit, basal conglomerate consisting of pebble to granule sized pumice, sub-rounded to rounded, matrix supported, matrix consists of coarse to fine grained pumiceous sandstone, wavy laminae to ripple sets, normal grading</p>                                                                                                                                           |      |        |        |           |
|                  | REWA FORMATION   | 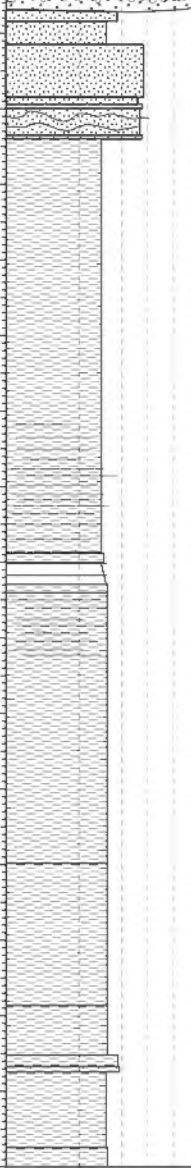 |            | <p>-Fine silty sandstone, massive, trace granule sized pumice clast, weakly cemented, loosely packed</p> <p>-Fine silty sandstone, wavy ripple and laminae sets, trace granule sized clasts of sub-rounded to rounded pumice, intercalated siltstone lenses, weakly cemented, loosely packed</p> <p>-Blue grey siltstone, laminated, weakly cemented</p> <p>-Blue grey siltstone, massive, weakly cemented</p> <p>-Blue grey siltstone, laminated, weakly cemented</p> <p>-Blue grey siltstone, massive, weakly cemented</p> |      |        |        |           |
|                  |                  |                                                                                    | mud        | silt                                                                                                                                                                                                                                                                                                                                                                                                                                                                                                                         | sand | gravel |        |           |

Name: Beaconsfield section

Coordinates (NZTM)

Elev (masl)

Location: Kiwitea Stream, off McBeth Road

-40.036947 S, 175.730524 E

298

3 of 10

| Age              | Formation                       | Scale (m) | Grain size |      |      |        | Sample | Comments:                                                                                                                                                                                                                       |
|------------------|---------------------------------|-----------|------------|------|------|--------|--------|---------------------------------------------------------------------------------------------------------------------------------------------------------------------------------------------------------------------------------|
|                  |                                 |           | mud        | silt | sand | gravel |        |                                                                                                                                                                                                                                 |
| LATE PLEISTOCENE | KAIMATIRA PUMICE SAND FORMATION | 50        |            |      |      |        |        | -Heterolithic fine silty sandstone and siltstone beds, massive to laminated, weakly cemented                                                                                                                                    |
|                  |                                 | 47.5      |            |      |      |        |        | -Fine to medium grained sandstone, crossbedded to laminated, trace intercalated siltstone, weakly cemented, tightly packed                                                                                                      |
|                  |                                 | 45        |            |      |      |        |        | -Heterolithic fine silty sandstone and siltstone beds, massive to laminated, weakly cemented                                                                                                                                    |
|                  |                                 | 42.5      |            |      |      |        |        | -Fine grained silty sandstone, laminated, weakly cemented, tightly packed                                                                                                                                                       |
|                  |                                 | 40        |            |      |      |        |        | -Blue grey siltstone, laminated, weakly cemented                                                                                                                                                                                |
|                  |                                 | 37.5      |            |      |      |        |        | -Fine grained silty sandstone, laminated, weakly cemented, tightly packed                                                                                                                                                       |
|                  |                                 | 35        |            |      |      |        |        | -Fine to medium grained silty sandstone, laminated, trace granule sized pumice clasts rounded to sub-rounded, weakly cemented, tightly packed                                                                                   |
|                  |                                 | 32.5      |            |      |      |        |        | -Fine to medium grained silty sandstone, crossbedded to laminated, with granule to small pebble sized pumice clasts rounded to sub-rounded, weakly cemented, tightly packed                                                     |
|                  |                                 | 30        |            |      |      |        |        | -Blue grey siltstone, laminated, weakly cemented                                                                                                                                                                                |
|                  |                                 | 27.5      |            |      |      |        |        | -Fine to medium grained silty sandstone, laminated, trace granule sized pumice clasts rounded to sub-rounded, weakly cemented, tightly packed                                                                                   |
|                  |                                 | 25        |            |      |      |        |        | -Blue grey siltstone, massive, weakly cemented                                                                                                                                                                                  |
|                  |                                 | 22.5      |            |      |      |        |        | -Fine grained silty sandstone, massive, weakly cemented, tightly packed                                                                                                                                                         |
|                  |                                 | 20        |            |      |      |        |        | -Alternating fine to coarse grained silty sandstone, wavy laminae, ripple and planar laminae sets, intercalated siltstone lenses, trace lenses of granule pumice clasts, rounded to sub-rounded weakly cemented, tightly packed |
|                  |                                 | 17.5      |            |      |      |        |        | -Blue grey siltstone, massive, weakly cemented                                                                                                                                                                                  |
|                  |                                 | 15        |            |      |      |        |        | -Alternating fine to medium grained silty sandstone, laminated, weakly cemented, tightly packed                                                                                                                                 |
|                  |                                 | 12.5      |            |      |      |        |        | -Water escape structures and convolute bedding present, fine to medium grained pumiceous sandstone, weakly cemented, tightly packed                                                                                             |
|                  |                                 | 10        |            |      |      |        |        | -Heterolithic fine to medium grained sandstone and siltstone beds, lenticular to laminae sets, trace pumice clasts, granule size, weakly cemented                                                                               |
|                  |                                 | 7.5       |            |      |      |        |        | -Coarse grained sandstone with granule to small pebble sized rounded to sub-rounded pumice clasts, discontinuous lenses of intercalated siltstone present, weakly cemented, loosely packed                                      |
|                  |                                 | 5         |            |      |      |        |        | -Fine grained sandstone, massive, weakly cemented, tightly packed                                                                                                                                                               |
|                  |                                 | 2.5       |            |      |      |        |        |                                                                                                                                                                                                                                 |
|                  |                                 | 0         |            |      |      |        |        |                                                                                                                                                                                                                                 |

Name: Beaconsfield section

Coordinates (NZTM)

Elev (masl)

Location: Kiwitea Stream

-40.037177 S, 175.729365 E

303

4 of 10

| Age              | Formation                       | Scale (m)                                                                                                                                  | Grain size                                                                          |      |      |        | Sample | Comments:                                                                                                                                                                                                                                                                                                                                                                                                                                                                                                                                                                                                                                                                                                                                                                                                                                                                                                                                                                                                                                                                                                                                                                                                                                                                                                                                                                                                                                                                                                                                                                                                                                                                                                                                                                                                                                              |
|------------------|---------------------------------|--------------------------------------------------------------------------------------------------------------------------------------------|-------------------------------------------------------------------------------------|------|------|--------|--------|--------------------------------------------------------------------------------------------------------------------------------------------------------------------------------------------------------------------------------------------------------------------------------------------------------------------------------------------------------------------------------------------------------------------------------------------------------------------------------------------------------------------------------------------------------------------------------------------------------------------------------------------------------------------------------------------------------------------------------------------------------------------------------------------------------------------------------------------------------------------------------------------------------------------------------------------------------------------------------------------------------------------------------------------------------------------------------------------------------------------------------------------------------------------------------------------------------------------------------------------------------------------------------------------------------------------------------------------------------------------------------------------------------------------------------------------------------------------------------------------------------------------------------------------------------------------------------------------------------------------------------------------------------------------------------------------------------------------------------------------------------------------------------------------------------------------------------------------------------|
|                  |                                 |                                                                                                                                            | mud                                                                                 | silt | sand | gravel |        |                                                                                                                                                                                                                                                                                                                                                                                                                                                                                                                                                                                                                                                                                                                                                                                                                                                                                                                                                                                                                                                                                                                                                                                                                                                                                                                                                                                                                                                                                                                                                                                                                                                                                                                                                                                                                                                        |
| LATE PLEISTOCENE | WAIOMIO FORMATION               | 50<br>47.5<br>45<br>42.5<br>40<br>37.5<br>35<br>32.5<br>30<br>27.5<br>25<br>22.5<br>20<br>17.5<br>15<br>12.5<br>10<br>7.5<br>5<br>2.5<br>0 | 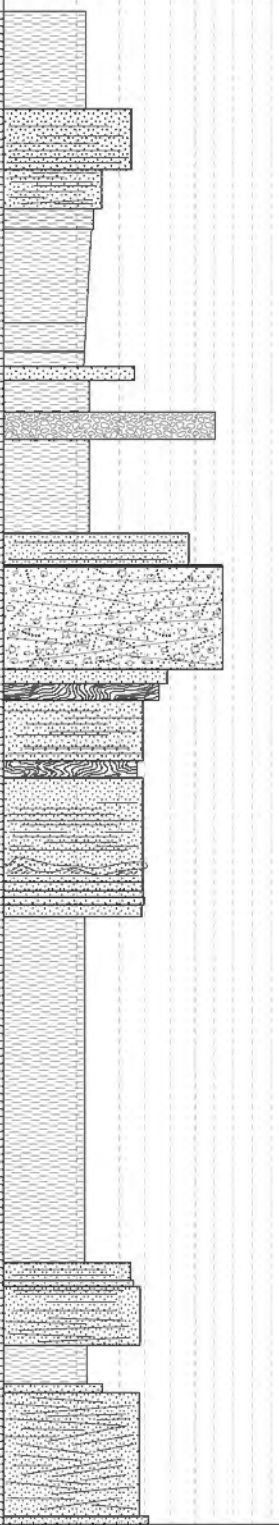  |      |      |        | CR-47  | <ul style="list-style-type: none"><li>-Blue grey siltstone, massive, weakly cemented</li><li>-Fine grained sandstone, laminated, weakly cemented, loosely packed</li><li>-Heterolithic fine silty sandstone and fine sandstone beds, laminated, weakly cemented</li><li>-Blue grey siltstone, massive, weakly cemented</li><li>-Fine grained sandstone bed, laminated, weakly cemented, loosely packed</li><li>-Clast supported conglomerate, indistinct laminae, small pebble to granule in size, rounded to sub-rounded greywacke and pumice clasts, moderately well sorted, weakly cemented</li><li>-Blue grey siltstone, massive, weakly cemented</li><li>-Medium to coarse grained sandstone bed, laminated, weakly cemented, loosely packed</li><li>-15cm lignite discontinuously capping underlying conglomerate</li><li>-Clast supported conglomerate, predominantly small pebble to granule sized clasts, rounded to sub-rounded pumice, greywacke, chert, andesite, large scale tough cross bedding, weakly cemented, tightly packed</li><li>-Convolute bedding, medium grained silty sandstone, weakly cemented</li><li>-Fine grained sandstone, laminated, weakly cemented, loosely packed</li><li>-Convolute beds, fine grained sandstone, weakly cemented</li><li>-Fine to medium grained sandstone, ripple laminae to laminae sets, with intercalated siltstone lenses, weakly cemented, loosely packed</li><li>-Blue grey siltstone, massive, weakly cemented</li><li>-Medium to fine grained sandstone, trace intercalated siltstone lenses, laminated, weakly cemented, loosely packed</li><li>-Blue grey siltstone, massive, weakly cemented</li><li>-Medium to fine grained sandstone, trace intercalated siltstone lenses, crossbedded at base transitioning to laminae sets upsection, weakly cemented, loosely packed</li></ul> |
|                  | KAIMATIRA PUMICE SAND FORMATION | 27.5<br>25<br>22.5<br>20<br>17.5<br>15<br>12.5<br>10<br>7.5<br>5<br>2.5<br>0                                                               | 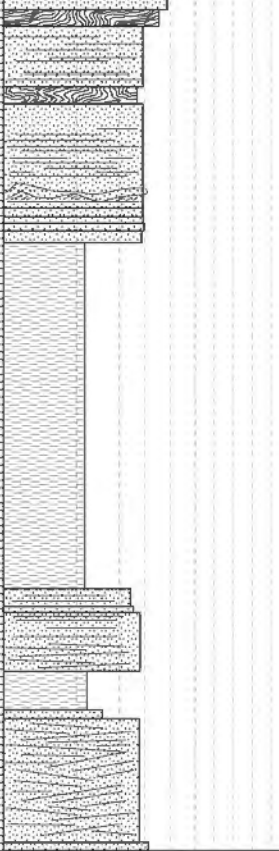 |      |      |        |        |                                                                                                                                                                                                                                                                                                                                                                                                                                                                                                                                                                                                                                                                                                                                                                                                                                                                                                                                                                                                                                                                                                                                                                                                                                                                                                                                                                                                                                                                                                                                                                                                                                                                                                                                                                                                                                                        |

Name: Beaconsfield section

Coordinates (NZTM)

Elev (masl)

Location: Section east of Beaconsfield Valley Rd

-40.039838 S, 175.718164 E

299

5 of 10

| Age              | Formation         | Scale (m) | Grain size |      |      |        | Sample | Comments:                                                                                                                                                                                                                                                                      |
|------------------|-------------------|-----------|------------|------|------|--------|--------|--------------------------------------------------------------------------------------------------------------------------------------------------------------------------------------------------------------------------------------------------------------------------------|
|                  |                   |           | mud        | silt | sand | gravel |        |                                                                                                                                                                                                                                                                                |
| LATE PLEISTOCENE | WAIOMIO FORMATION | 50        |            |      |      |        |        | -Medium grained sandstone, laminated, weakly cemented, loosely packed                                                                                                                                                                                                          |
|                  |                   | 47.5      |            |      |      |        |        |                                                                                                                                                                                                                                                                                |
|                  |                   | 45        |            |      |      |        |        | -Clast supported conglomerate, rounded to sub-rounded clasts of predominantly greywacke, massive, pebble to cobble sized clasts, sporadic rip up clasts of siltstone present, poorly sorted, cemented                                                                          |
|                  |                   | 42.5      |            |      |      |        |        |                                                                                                                                                                                                                                                                                |
|                  |                   | 40        |            |      |      |        |        | -Clast supported conglomerate, rounded to sub-rounded clasts of predominantly greywacke, crossbedded, pebble to cobble sized clasts, discontinuous siltstone lenses draping cross bed sets, poorly sorted, cemented                                                            |
|                  |                   | 37.5      |            |      |      |        |        | -Clast supported conglomerate, rounded to sub-rounded clasts of predominantly greywacke, massive, pebble to cobble sized clasts, sporadic rip up clasts of siltstone present, poorly sorted, cemented                                                                          |
|                  |                   | 35        |            |      |      |        |        |                                                                                                                                                                                                                                                                                |
|                  |                   | 32.5      |            |      |      |        |        | -Clast supported conglomerate, rounded to sub-rounded clasts of predominantly greywacke, crossbedded pebble to cobble sized clasts, poorly sorted, cemented<br>-Medium grained sandstone, crossbedded, weakly cemented, loosely packed                                         |
|                  |                   | 30        |            |      |      |        |        | -Clast supported conglomerate, rounded to sub-rounded clasts of predominantly greywacke, indistinct laminated sets, pebble to cobble sized clasts, poorly sorted, intercalated fine to medium grained sandstone and siltstone beds, cemented                                   |
|                  |                   | 27.5      |            |      |      |        |        | -Clast supported conglomerate, rounded to sub-rounded clasts of predominantly greywacke, reverse graded sets from small to large pebbles and small cobbles, moderately well sorted, cemented                                                                                   |
|                  |                   | 25        |            |      |      |        |        | -Clast supported conglomerate, rounded to sub-rounded clasts of greywacke, jasper, rhyolite, pumice and rip up clasts of siltstone, discontinuous lenses of siltstone draping cross bed sets, reverse grading, predominantly small to large pebble with rare cobbles, cemented |
|                  |                   | 22.5      |            |      |      |        |        | -Blue grey siltstone, laminated, weakly cemented                                                                                                                                                                                                                               |
|                  |                   | 20        |            |      |      |        |        |                                                                                                                                                                                                                                                                                |
|                  |                   | 17.5      |            |      |      |        |        | -Blue grey siltstone, massive, weakly cemented                                                                                                                                                                                                                                 |
|                  |                   | 15        |            |      |      |        |        | -Blue grey siltstone, laminated, weakly cemented                                                                                                                                                                                                                               |
|                  |                   | 12.5      |            |      |      |        |        |                                                                                                                                                                                                                                                                                |
|                  |                   | 10        |            |      |      |        |        |                                                                                                                                                                                                                                                                                |
|                  |                   | 7.5       |            |      |      |        |        | -Blue grey siltstone, massive, weakly cemented                                                                                                                                                                                                                                 |
|                  |                   | 5         |            |      |      |        |        |                                                                                                                                                                                                                                                                                |
|                  |                   | 2.5       |            |      |      |        |        |                                                                                                                                                                                                                                                                                |
|                  |                   | 0         |            |      |      |        |        |                                                                                                                                                                                                                                                                                |
|                  |                   |           | mud        | silt | sand | gravel |        |                                                                                                                                                                                                                                                                                |

|                                  |                            |             |
|----------------------------------|----------------------------|-------------|
| Name: Beaconsfield section       | Coordinates (NZTM)         | Elev (masl) |
| Location: Section down Jens Road | -40.042696 S, 175.712543 E | 285         |
|                                  |                            | 6 of 10     |

| Age              | Formation         | Scale (m)                                                                                                | Grain size                                                                         |      |      |        | Sample | Comments:                                                                                                                                                                                                                                                                                                                                                                                                                                                                                                                                                                                                                                                                                                                                                                                                                                                                                                                                                                                                                                                                                                                                                                                                                                                                                                                                                                                                                    |
|------------------|-------------------|----------------------------------------------------------------------------------------------------------|------------------------------------------------------------------------------------|------|------|--------|--------|------------------------------------------------------------------------------------------------------------------------------------------------------------------------------------------------------------------------------------------------------------------------------------------------------------------------------------------------------------------------------------------------------------------------------------------------------------------------------------------------------------------------------------------------------------------------------------------------------------------------------------------------------------------------------------------------------------------------------------------------------------------------------------------------------------------------------------------------------------------------------------------------------------------------------------------------------------------------------------------------------------------------------------------------------------------------------------------------------------------------------------------------------------------------------------------------------------------------------------------------------------------------------------------------------------------------------------------------------------------------------------------------------------------------------|
|                  |                   |                                                                                                          | mud                                                                                | silt | sand | gravel |        |                                                                                                                                                                                                                                                                                                                                                                                                                                                                                                                                                                                                                                                                                                                                                                                                                                                                                                                                                                                                                                                                                                                                                                                                                                                                                                                                                                                                                              |
| LATE PLEISTOCENE | REU REU FORMATION | 50<br>47.5<br>45<br>42.5<br>40                                                                           | 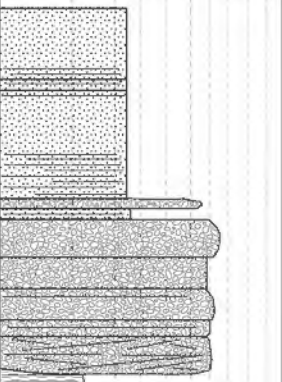  |      |      |        | CR-62B | <ul style="list-style-type: none"> <li>-Fine grained sandstone, laminated to massive, weakly cemented, loosely packed</li> <li>-Heterolithic beds of alternating fine grained sandstone and conglomerate lenses, laminated, weakly cemented</li> <li>-Clast supported conglomerate, granule to cobble sized rounded to sub-rounded clasts of greywacke, rhyolite, pumice, jasper, chert, rip up clasts of siltstone and mudstone, crossbedded at the base grading into massive conglomerate up section, cemented</li> </ul>                                                                                                                                                                                                                                                                                                                                                                                                                                                                                                                                                                                                                                                                                                                                                                                                                                                                                                  |
|                  | WAIOMIO FORMATION | 37.5<br>35<br>32.5<br>30<br>27.5<br>25<br>22.5<br>20<br>17.5<br>15<br>12.5<br>10<br>7.5<br>5<br>2.5<br>0 | 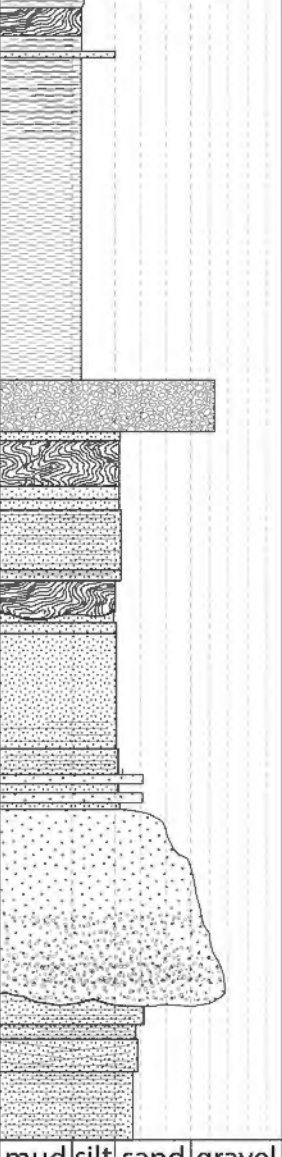 |      |      |        |        | <ul style="list-style-type: none"> <li>-Heterolithic beds of alternating siltstone and fine grained sandstone, laminated, occasional soft sediment deformation structures (convolute bedding), weakly cemented</li> <li>-Blue grey siltstone, massive, weakly cemented</li> <li>-Clast supported conglomerate, predominantly greywacke clasts with rare pumice, and rip up clasts of siltstone, massive, cemented</li> <li>-Fine grained silty sandstone, convolute bedding, weakly cemented, tightly packed</li> <li>-Fine to medium grained sandstone, laminated, weakly cemented, tightly packed</li> <li>-Fine grained silty sandstone, convolute bedding, weakly cemented, tightly packed</li> <li>-Fine grained sandstone, laminated transitioning into massive upsection, weakly cemented, loosely packed</li> <li>-Heterolithic beds of fine sandstone and medium to coarse grained sandstone with pumice clasts, small pebble to granule in size, laminated, weakly cemented, tightly packed</li> <li>-Clast supported conglomerate, vitric volcaniclastic beds composed entirely of pumice, normal grading from pebble to medium sand sized clasts, rounded to sub-rounded, massive, weakly cemented, tightly packed</li> <li>-Fine grained sandstone, cross laminae to wavy laminae sets, weakly cemented, loosely packed</li> <li>-Fine grained sandstone, laminated, weakly cemented, loosely packed</li> </ul> |

|                                                   |                            |             |
|---------------------------------------------------|----------------------------|-------------|
| Name: Beaconsfield section                        | Coordinates (NZTM)         | Elev (masl) |
| Location: Kiwitea Stream, downstream of Jens Road | -40.052815 S, 175.702586 E | 277         |
|                                                   |                            | 7 of 10     |

| Age              | Formation           | Scale (m) | Grain size                                                                         |      |      |        | Sample | Comments:                                                                                                                                                                                                                                       |
|------------------|---------------------|-----------|------------------------------------------------------------------------------------|------|------|--------|--------|-------------------------------------------------------------------------------------------------------------------------------------------------------------------------------------------------------------------------------------------------|
|                  |                     |           | mud                                                                                | silt | sand | gravel |        |                                                                                                                                                                                                                                                 |
| LATE PLEISTOCENE | TOKORANGI FORMATION | 50        | 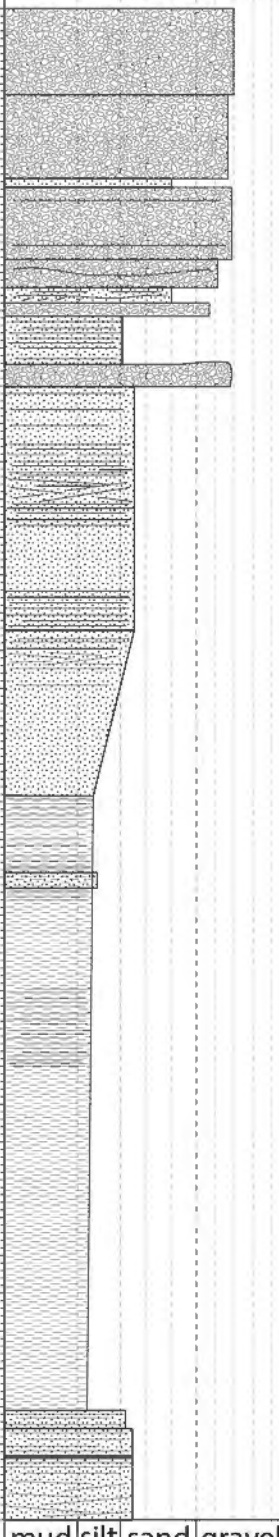 |      |      |        |        | -Clast supported conglomerate, clast size increasing slightly, with more common cobbles, predominantly greywacke clasts, rounded to sub-rounded, massive, poorly sorted, cemented                                                               |
|                  |                     | 47.5      |                                                                                    |      |      |        |        |                                                                                                                                                                                                                                                 |
|                  |                     | 45        |                                                                                    |      |      |        |        |                                                                                                                                                                                                                                                 |
|                  |                     | 42.5      |                                                                                    |      |      |        |        | -Clast supported conglomerate, indistinct wavy bedding, predominantly greywacke clasts, pebble to cobble in size, rounded to sub-rounded, thin discontinuous lenses of intercalated siltstone present, cemented                                 |
| LATE PLEISTOCENE | REU REU FORMATION   | 40        |                                                                                    |      |      |        |        | -Fine silty sandstone, laminated, weakly cemented, tightly packed                                                                                                                                                                               |
|                  |                     | 37.5      |                                                                                    |      |      |        |        | -Heterolithic beds of alternating conglomerate and fine silty sandstone, laminated, clasts range from pebbles to cobbles in size, predominantly composed of sub-rounded to rounded greywacke, rare rip up clasts of siltstone present, cemented |
|                  |                     | 35        |                                                                                    |      |      |        |        | -Fine silty sandstone, cross bedded to laminated, weakly cemented, tightly packed                                                                                                                                                               |
|                  |                     | 32.5      |                                                                                    |      |      |        |        |                                                                                                                                                                                                                                                 |
|                  |                     | 30        |                                                                                    |      |      |        |        |                                                                                                                                                                                                                                                 |
|                  |                     | 27.5      |                                                                                    |      |      |        |        | -Fine silty sandstone, reverse grading, laminated to massive, weakly cemented, tightly packed                                                                                                                                                   |
|                  |                     | 25        |                                                                                    |      |      |        |        |                                                                                                                                                                                                                                                 |
|                  |                     | 22.5      |                                                                                    |      |      |        |        | -Heterolithic beds of alternating siltstone and fine grained sandstone, laminated, weakly cemented                                                                                                                                              |
|                  |                     | 20        |                                                                                    |      |      |        |        | -Blue grey siltstone, massive, weakly cemented                                                                                                                                                                                                  |
|                  |                     | 17.5      |                                                                                    |      |      |        |        | -Blue grey siltstone, laminated, weakly cemented                                                                                                                                                                                                |
|                  |                     | 15        |                                                                                    |      |      |        |        |                                                                                                                                                                                                                                                 |
|                  |                     | 12.5      |                                                                                    |      |      |        |        |                                                                                                                                                                                                                                                 |
|                  |                     | 10        |                                                                                    |      |      |        |        |                                                                                                                                                                                                                                                 |
|                  |                     | 7.5       |                                                                                    |      |      |        |        | -Blue grey siltstone, massive, weakly cemented                                                                                                                                                                                                  |
|                  |                     | 5         |                                                                                    |      |      |        |        |                                                                                                                                                                                                                                                 |
|                  |                     | 2.5       |                                                                                    |      |      |        |        |                                                                                                                                                                                                                                                 |
|                  |                     | 0         |                                                                                    |      |      |        |        | -Fine grained sandstone, wavy laminae to planar laminae sets, weakly cemented, loosely packed                                                                                                                                                   |

Name: Beaconsfield section

Coordinates (NZTM)

Elev (masl)

Location: Buckland section east of Williamson Road

-40.059483 S, 175.68203 E

257

8 of 10

| Age              | Formation           | Scale (m) | Grain size |      |      |        | Sample /Wp | Comments:                                                                                                                                                                                                                                                                                                                                                                                                                                                                        |
|------------------|---------------------|-----------|------------|------|------|--------|------------|----------------------------------------------------------------------------------------------------------------------------------------------------------------------------------------------------------------------------------------------------------------------------------------------------------------------------------------------------------------------------------------------------------------------------------------------------------------------------------|
|                  |                     |           | mud        | silt | sand | gravel |            |                                                                                                                                                                                                                                                                                                                                                                                                                                                                                  |
| LATE PLEISTOCENE | TOKORANGI FORMATION | 50        |            |      |      |        |            |                                                                                                                                                                                                                                                                                                                                                                                                                                                                                  |
|                  |                     | 47.5      |            |      |      |        |            |                                                                                                                                                                                                                                                                                                                                                                                                                                                                                  |
|                  |                     | 45        |            |      |      |        |            | -Blue grey siltstone, massive, weakly cemented                                                                                                                                                                                                                                                                                                                                                                                                                                   |
|                  |                     | 42.5      |            |      |      |        |            |                                                                                                                                                                                                                                                                                                                                                                                                                                                                                  |
|                  |                     | 40        |            |      |      |        |            | -Blue grey siltstone, laminated, weakly cemented                                                                                                                                                                                                                                                                                                                                                                                                                                 |
|                  |                     | 37.5      |            |      |      |        |            | -Clast supported conglomerate, pebble sized rounded to sub-rounded clasts of greywacke and pumice, cemented                                                                                                                                                                                                                                                                                                                                                                      |
|                  |                     | 35        |            |      |      |        |            | -Fine to medium grained sandstone, laminated, weakly cemented, loosely packed                                                                                                                                                                                                                                                                                                                                                                                                    |
|                  |                     | 32.5      |            |      |      |        |            | -Fine to medium grained sandstone, massive with lenses of rippled to crossbedded sandstone containing granule sized pumice clasts, rounded to sub-rounded, weakly cemented, loosely packed                                                                                                                                                                                                                                                                                       |
|                  |                     | 30        |            |      |      |        |            | -Fine silty sandstone, laminated, weakly cemented, loosely packed                                                                                                                                                                                                                                                                                                                                                                                                                |
|                  |                     | 27.5      |            |      |      |        |            | -Blue grey siltstone, wavy laminae sets, weakly cemented                                                                                                                                                                                                                                                                                                                                                                                                                         |
|                  |                     | 25        |            |      |      |        | CR-61      | -Heterolithic beds of alternating siltstone and matrix supported conglomerate beds, laminated, weakly cemented                                                                                                                                                                                                                                                                                                                                                                   |
|                  |                     | 22.5      |            |      |      |        |            | -Matrix supported conglomerate, small pebble to graule sized clasts of rounded to sub-rounded greywacke and pumice within coarse to fine sandstone matrix, crossbedded at base grading into cross laminae sets upsection, basal crossbeds contain crushed shell material and occasional fossils preserved whole including <i>Glycymeris modesta</i> , <i>Tanea zelandica</i> , <i>Talochlamys gemmulata</i> , and <i>Pecten novaezelandiae</i> , weakly cemented, loosely packed |
|                  |                     | 20        |            |      |      |        |            | -Fine to medium grained sandstone, laminated, weakly cemented, loosely packed                                                                                                                                                                                                                                                                                                                                                                                                    |
|                  |                     | 17.5      |            |      |      |        |            | -Clast supported conglomerate, pebble to cobble in size, rounded to sub-rounded clasts, predominantly greywacke, discontinuous lenses of intercalated siltstone, predominantly massive, poorly sorted, cemented                                                                                                                                                                                                                                                                  |
|                  |                     | 15        |            |      |      |        |            | -Fine silty sandstone, wavy to cross laminae and laminae sets, weakly cemented, loosely packed                                                                                                                                                                                                                                                                                                                                                                                   |
|                  |                     | 12.5      |            |      |      |        |            | -Blue grey siltstone, laminated, weakly cemented                                                                                                                                                                                                                                                                                                                                                                                                                                 |
|                  |                     | 10        |            |      |      |        |            | -Blue grey siltstone, massive, weakly cemented                                                                                                                                                                                                                                                                                                                                                                                                                                   |
|                  |                     | 7.5       |            |      |      |        |            | -Fine silty sandstone, wavy to cross laminae and laminae sets, weakly cemented, loosely packed                                                                                                                                                                                                                                                                                                                                                                                   |
|                  |                     | 5         |            |      |      |        |            | -Fine silty sandstone to siltstone, normal grading, laminated, weakly cemented                                                                                                                                                                                                                                                                                                                                                                                                   |
|                  |                     | 2.5       |            |      |      |        |            | -Clast supported conglomerate, pebble to cobble in size, rounded to sub-rounded clasts, predominantly greywacke, discontinuous lenses of siltstone, predominantly massive, poorly sorted, cemented                                                                                                                                                                                                                                                                               |
|                  |                     | 0         |            |      |      |        |            |                                                                                                                                                                                                                                                                                                                                                                                                                                                                                  |

Name: Beaconsfield section

Coordinates (NZTM)

Elev (masl)

Location: Section off Levett and Haynes Line

-40.068417 S, 175.660658 E

235

9 of 10

| Age              | Formation           | Scale (m) | Grain size |      |      |        | Sample | Comments:                                                                                                                                                                                                                        |
|------------------|---------------------|-----------|------------|------|------|--------|--------|----------------------------------------------------------------------------------------------------------------------------------------------------------------------------------------------------------------------------------|
|                  |                     |           | mud        | silt | sand | gravel |        |                                                                                                                                                                                                                                  |
| LATE PLEISTOCENE | TOKORANGI FORMATION | 50        |            |      |      |        |        | -Blue grey siltstone, massive, weakly cemented                                                                                                                                                                                   |
|                  |                     | 47.5      |            |      |      |        |        |                                                                                                                                                                                                                                  |
|                  |                     | 45        |            |      |      |        |        | -Blue grey siltstone, laminated, weakly cemented                                                                                                                                                                                 |
|                  |                     | 42.5      |            |      |      |        |        | -Fine to medium grained sandstone, laminated, weakly cemented, loosely packed                                                                                                                                                    |
|                  |                     | 40        |            |      |      |        |        | -Fine to medium grained sandstone, massive, with sub-rounded to rounded clasts of greywacke small pebble to granule in size, weakly cemented, loosely packed                                                                     |
|                  |                     | 37.5      |            |      |      |        |        | -Blue grey siltstone, laminated, weakly cemented                                                                                                                                                                                 |
|                  |                     | 35        |            |      |      |        |        | -Blue grey siltstone, massive, weakly cemented                                                                                                                                                                                   |
|                  |                     | 32.5      |            |      |      |        |        |                                                                                                                                                                                                                                  |
|                  |                     | 30        |            |      |      |        |        | -Fine to medium grained sandstone, laminated, weakly cemented, loosely packed                                                                                                                                                    |
|                  |                     | 27.5      |            |      |      |        |        | -Blue grey siltstone, laminated, weakly cemented                                                                                                                                                                                 |
|                  |                     | 25        |            |      |      |        |        | -Blue grey siltstone, massive, weakly cemented                                                                                                                                                                                   |
|                  |                     | 22.5      |            |      |      |        |        | -Clast supported conglomerate, pebble to cobble in size, rounded to sub-rounded clasts, predominantly greywacke, discontinuous lenses of intercalated siltstone, predominantly massive, reverse grading, poorly sorted, cemented |
|                  |                     | 20        |            |      |      |        |        |                                                                                                                                                                                                                                  |
|                  |                     | 17.5      |            |      |      |        |        | -Fine grained silty sandstone, laminated, weakly cemented, loosely packed                                                                                                                                                        |
|                  |                     | 15        |            |      |      |        |        | -Fine grained silty sandstone, massive, weakly cemented, loosely packed                                                                                                                                                          |
|                  |                     | 12.5      |            |      |      |        |        |                                                                                                                                                                                                                                  |
|                  |                     | 10        |            |      |      |        |        | -Fine grained silty sandstone, laminated, weakly cemented, loosely packed                                                                                                                                                        |
|                  |                     | 7.5       |            |      |      |        |        | -Fine to medium grained sandstone, reverse grading, laminated, weakly cemented, loosely packed                                                                                                                                   |
|                  |                     | 5         |            |      |      |        |        | -Heterolithic beds of fine silty sandstone and siltstone, laminated, weakly cemented                                                                                                                                             |
|                  |                     | 2.5       |            |      |      |        |        | -Blue grey siltstone, laminated, weakly cemented                                                                                                                                                                                 |
|                  |                     | 0         |            |      |      |        |        | -Blue grey siltstone, massive, weakly cemented                                                                                                                                                                                   |

|                                            |                            |             |
|--------------------------------------------|----------------------------|-------------|
| Name: Beaconsfield section                 | Coordinates (NZTM)         | Elev (masl) |
| Location: Section around Beaconsfield Hall | -40.099774 S, 175.657096 E | 210         |
|                                            |                            | 10 of 10    |

| Age              | Formation           | Scale (m) | Grain size |      |      |        | Sample | Comments:                                                                                                                                                                                                                         |
|------------------|---------------------|-----------|------------|------|------|--------|--------|-----------------------------------------------------------------------------------------------------------------------------------------------------------------------------------------------------------------------------------|
|                  |                     |           | mud        | silt | sand | gravel |        |                                                                                                                                                                                                                                   |
| LATE PLEISTOCENE | MANGATAPU FORMATION | 50        |            |      |      |        |        |                                                                                                                                                                                                                                   |
|                  |                     | 47.5      |            |      |      |        |        | -Fine to medium grained sandstone, laminated, weakly cemented, loosely packed                                                                                                                                                     |
|                  |                     | 45        |            |      |      |        |        |                                                                                                                                                                                                                                   |
|                  |                     | 42.5      |            |      |      |        |        | -Clast supported conglomerate, rounded to sub-rounded pebble clasts, predominantly greywacke, massive, poorly sorted, cemented                                                                                                    |
|                  |                     | 40        |            |      |      |        |        | -Fine to medium grained sandstone, laminated, weakly cemented, loosely packed                                                                                                                                                     |
|                  |                     | 37.5      |            |      |      |        |        |                                                                                                                                                                                                                                   |
|                  |                     | 35        |            |      |      |        |        | -Clast supported conglomerate, pebble to cobble in size, rounded to sub-rounded clasts, predominantly greywacke, discontinuous lenses of intercalated siltstone, massive, poorly sorted, cemented                                 |
|                  |                     | 32.5      |            |      |      |        |        |                                                                                                                                                                                                                                   |
|                  |                     | 30        |            |      |      |        |        |                                                                                                                                                                                                                                   |
|                  |                     | 27.5      |            |      |      |        |        | -Clast supported conglomerate, pebble to cobble in size, rounded to sub-rounded clasts, predominantly greywacke, discontinuous lenses of intercalated siltstone, 1 to 3m thick bed sets, reverse grading, poorly sorted, cemented |
|                  |                     | 25        |            |      |      |        |        |                                                                                                                                                                                                                                   |
|                  |                     | 22.5      |            |      |      |        |        |                                                                                                                                                                                                                                   |
|                  | TOKORANGI FORMATION | 20        |            |      |      |        |        | -Fine to medium grained sandstone, crossbedded to laminated, weakly cemented, loosely packed                                                                                                                                      |
|                  |                     | 17.5      |            |      |      |        |        | -Blue grey siltstone, laminated, weakly cemented                                                                                                                                                                                  |
|                  |                     | 15        |            |      |      |        |        | -Blue grey siltstone, massive, weakly cemented                                                                                                                                                                                    |
|                  |                     | 12.5      |            |      |      |        |        | -Fine to medium grained sandstone, laminated, reverse grading, weakly cemented, loosely packed                                                                                                                                    |
|                  |                     | 10        |            |      |      |        |        | -Blue grey siltstone, laminated, weakly cemented                                                                                                                                                                                  |
|                  |                     | 7.5       |            |      |      |        |        | -Blue grey siltstone, massive, weakly cemented                                                                                                                                                                                    |
|                  |                     | 5         |            |      |      |        |        | -Blue grey siltstone, laminated, weakly cemented                                                                                                                                                                                  |
|                  |                     | 2.5       |            |      |      |        |        | -Blue grey siltstone, massive, weakly cemented                                                                                                                                                                                    |
|                  |                     | 0         |            |      |      |        |        | -Blue grey siltstone, massive, weakly cemented                                                                                                                                                                                    |
|                  |                     |           | mud        | silt | sand | gravel |        |                                                                                                                                                                                                                                   |
