# Supplementary material
Source: publisher figshare collection journal article supplement (https://tandf.figshare.com/articles/dataset/_/11097479)
Supplement: Supplementary file 1 [file 1 › tnzg_a_1691611_sm3031.xlsx]

## Sheet: Rangitikei Major Elements
Normalised EPMA data from Rangitikei
Sample code	Tephra-fall/ volcaniclastic unit	Grid Ref.	Reading	SiO2	Al2O3	TiO2	FeO	MgO	CaO	Na2O	K2O	Cl	Total	Analytical sum prior to recalculation on an anhydrous basis
CR-61	Onepuhi	BL35 302 620	1	77.8283	12.6035	0.138116	1.06379	0.116544	0.722997	3.33978	3.95543	0.231515	100	3.77279
			2	77.6798	12.4121	0.0476743	1.01993	0.0752857	0.679273	3.56578	4.29917	0.220982	100	3.03392
			3	77.6182	12.4887	0.113313	1.06701	0.0775269	0.730464	3.63032	4.06302	0.211497	100	3.10776
			4	77.713	12.3824	0.0119771	0.938296	0.0592087	0.612525	3.47438	4.58257	0.225592	100	3.50792
			5	77.4598	12.5541	0.15641	1.20686	0.104637	0.740685	3.35341	4.19669	0.227503	100	3.94443
			6	77.8253	12.5408	0.180954	0.952521	0.0872455	0.759097	3.2691	4.15336	0.231659	100	4.19967
			7	77.6646	12.5988	0.227362	0.934292	0.0799699	0.734758	3.52134	4.01176	0.227152	100	3.42177
			8	77.7776	12.4487	0.0479	0.995176	0.029599	0.638333	3.47267	4.37155	0.218504	100	3.49067
			9	76.4153	13.6725	0.0586786	1.02499	0.0859486	0.701359	3.32609	4.35344	0.361693	100	11.3708
			10	77.5592	12.6484	0.0479784	0.995747	0.0944328	0.733602	3.5438	4.15357	0.223274	100	3.64841
			11	77.5335	12.6457	0.150793	0.868433	0.0530093	0.761022	3.4007	4.34724	0.239645	100	4.19848
			12	77.4043	12.6369	0.173314	1.06925	0.111611	0.757868	3.48578	4.14115	0.219856	100	3.31087
			13	77.8724	12.4259	0.174071	0.929882	0.048356	0.571605	3.30996	4.45759	0.210217	100	3.73131
			14	77.6114	12.4065	0.0298058	0.983435	0.0403832	0.582962	3.68615	4.43831	0.221051	100	3.06419
			15	77.7098	12.5727	0.0779268	1.00584	0.0713388	0.77745	3.43959	4.14425	0.201113	100	3.60138
			16	77.9478	12.3383	0.0898833	1.01499	0.0746045	0.575433	3.49067	4.25315	0.215149	100	3.56672
			17	77.6292	12.5228	0.0239768	1.05869	0.0910917	0.73899	3.64336	4.04934	0.242564	100	3.59882
			18	77.7327	12.4485	0	0.942616	0.0601762	0.602593	3.55933	4.42633	0.227748	100	3.3012
			19	77.9523	12.5313	0.0238607	0.973572	0.0535164	0.613	3.65283	3.98099	0.218566	100	3.12939
			20	77.6691	12.6293	0.144151	1.05765	0.0835773	0.7607	3.3929	4.04601	0.216538	100	3.79261
			21	77.6746	12.6501	0.161531	1.06615	0.0996785	0.729888	3.25114	4.13717	0.22977	100	3.41204
			22	79.0309	12.6249	0.0120496	0.933346	0.058464	0.589189	2.08739	4.44487	0.218979	100	4.08858
			Av	77.6959	12.581	0.0950786	1.00466	0.075282	0.686991	3.40439	4.22759	0.229117	100	3.92244
			StD	0.417302	0.256404	0.0669715	0.0705326	0.022597	0.0711304	0.313017	0.175099	0.030365		1.65958
CR-62B	Kupe	BL34 109 672	Reading	SiO2	Al2O3	TiO2	FeO	MgO	CaO	Na2O	K2O	Cl	Total	Analytical sum prior to recalculation on an anhydrous basis
			1	77.5758	12.3692	0.187634	1.2698	0.104171	0.733588	3.62168	3.91108	0.227118	100	4.53054
			2	77.3918	12.3303	0.197598	1.30268	0.104151	0.777562	3.76581	3.90454	0.225565	100	3.49609
			3	77.749	12.3528	0.273756	1.30953	0.0779684	0.761699	3.49847	3.73325	0.243491	100	5.01335
			4	77.8611	12.3825	0.212531	1.22999	0.0778255	0.704813	3.8311	3.46152	0.238577	100	4.83893
			5	77.5628	12.3762	0.188113	1.36405	0.112214	0.772428	3.67838	3.71542	0.230377	100	4.77364
			6	77.8242	12.3277	0.23797	1.16167	0.0715	0.651496	3.49346	3.98415	0.247815	100	5.2984
			7	78.2142	12.2686	0.115368	1.07243	0.0478043	0.579199	3.50732	3.94675	0.248392	100	4.83349
			8	77.8791	12.3387	0.206476	1.0115	0.0678248	0.552992	3.55087	4.17632	0.216256	100	4.84664
			9	77.9201	12.3108	0.211028	1.33831	0.105977	0.699826	3.55398	3.63193	0.228016	100	4.16081
			10	77.4401	12.3954	0.119359	1.33415	0.088507	0.752973	3.80106	3.848	0.220424	100	3.17438
			Average	77.7418	12.3452	0.194983	1.23941	0.0857943	0.698657	3.63021	3.8313	0.232603	100	4.49663
			Std	0.238324	0.0362312	0.0457343	0.114058	0.0197042	0.0758714	0.123932	0.191643	0.0107522		0.648311
CR-47	Kaukatea	BL35 320 647	Reading	SiO2	TiO2	Al2O3	FeO	MgO	CaO	Na2O	K2O	Cl	Total	Analytical sum prior to recalculation on an anhydrous basis
			1	75.876	0.319459	13.0536	1.7961	0.137257	1.08391	4.17901	3.37035	0.184345	100	4.82789
			2	76.4141	0.207772	13.2848	1.57602	0.159505	1.08701	3.85226	3.24902	0.169587	100	5.6548
			3	76.6823	0.295782	13.0162	1.41946	0.111485	0.912078	3.65496	3.75973	0.148017	100	5.3248
			4	75.9306	0.168211	13.2305	1.71233	0.160387	1.08863	4.054	3.46744	0.187907	100	4.87006
			5	76.4373	0.200569	13.3858	1.60202	0.132658	1.10686	3.69694	3.26246	0.175382	100	6.25558
			6	75.9815	0.188727	13.3197	1.64628	0.166528	1.07831	4.02293	3.41665	0.179303	100	4.6132
			7	76.0262	0.252456	13.2691	1.63493	0.147286	1.13475	3.83046	3.5307	0.174084	100	4.9227
			8	78.0653	0.123861	12.8864	1.64368	0.139466	0.917625	2.39908	3.65256	0.171998	100	6.33577
			Av	76.4267	0.219605	13.1807	1.62885	0.144322	1.05115	3.71121	3.46361	0.173828	100	5.3506
			Std	0.676256	0.0613566	0.162926	0.101772	0.0168757	0.0804398	0.52353	0.167825	0.0113403		0.623875
CR-31	Potaka	BL34 052 739	Reading	SiO2	Al2O3	TiO2	FeO	MgO	CaO	Na2O	K2O	Cl	Total	Analytical sum prior to recalculation on an anhydrous basis
			1	77.8717	12.6291	0	1.00794	0.0546534	0.661096	3.29602	4.2409	0.238583	100	4.855
			2	78.1538	12.4907	0.0279828	1.139	0.110895	0.810463	3.20558	3.80565	0.25599	100	3.512
			3	77.8461	12.6089	0	1.27663	0.109425	0.886865	2.99929	4.01851	0.254283	100	4.044
			4	78.4479	12.4314	0	0.876873	0.0937275	0.74253	3.05864	4.11464	0.234319	100	3.977
			5	77.934	12.5635	0.0144634	1.21079	0.102277	0.866771	3.12513	3.95987	0.22315	100	3.204
			Av	78.0507	12.5447	0.00848923	1.10225	0.0941955	0.793545	3.13693	4.02791	0.241265	100	3.9184
			Std	0.22623	0.0739791	0.0112418	0.143687	0.0206877	0.0830687	0.105105	0.146287	0.012409		0.560706
CR-32	Potaka	BL34 049 741	Reading	SiO2	Al2O3	TiO2	FeO	MgO	CaO	Na2O	K2O	Cl	Total	Analytical sum prior to recalculation on an anhydrous basis
			1	77.9549	12.685	0.00743368	1.28496	0.0987618	0.868679	3.40144	3.44286	0.255931	100	5.834
			2	77.5406	12.9057	0.00319343	1.29866	0.129866	0.968672	3.55109	3.37013	0.232056	100	6.057
			3	78.0072	12.631	0	0.992769	0.0849428	0.637071	3.46354	3.94984	0.233593	100	5.819
			4	77.4973	12.8117	0.00740012	1.30876	0.144831	0.866872	3.57955	3.57003	0.213546	100	5.407
			5	77.8632	12.8197	0.0212404	1.1969	0.0892099	0.869796	3.3305	3.56202	0.247451	100	5.84
			6	77.9963	12.5815	0	0.935188	0.095513	0.755707	3.00813	4.37785	0.249803	100	4.725
			7	78.0342	12.5999	0	1.05299	0.0814057	0.690362	3.0543	4.24472	0.242103	100	5.412
			8	77.754	12.6225	0.0103446	1.04066	0.0951701	0.716879	3.4644	4.04266	0.253442	100	3.331
			9	77.7878	12.6396	0.010379	1.03168	0.0643501	0.723419	3.41055	4.07896	0.253249	100	3.652
			10	78.362	12.4524	0	1.12818	0.103912	0.872645	3.2817	3.55632	0.242814	100	5.689
			11	77.9637	12.6122	0.0020642	0.998039	0.0846321	0.701827	3.37703	4.01589	0.244607	100	3.11
			12	77.8061	12.6109	0	1.06144	0.121159	0.689677	3.0963	4.38038	0.234034	100	3.433
			13	78.0149	12.5864	0	1.02815	0.0990224	0.661554	3.35728	4.00409	0.248609	100	5.072
			14	77.4897	12.7986	0.00623208	1.20799	0.126719	0.871453	3.39129	3.88882	0.219162	100	3.724
			15	78.0141	12.6337	0	0.989429	0.0593033	0.655458	3.23047	4.17724	0.240335	100	3.884
			16	77.6098	12.5886	0	1.16617	0.135238	0.886327	3.33205	4.04361	0.238227	100	3.873
			17	77.936	12.459	0.00928314	1.07684	0.114492	0.868489	3.21609	4.08252	0.237236	100	3.05
			18	77.7277	12.4788	0.0166787	1.21963	0.12092	0.874587	2.87811	4.45424	0.229331	100	4.069
			19	79.4183	12.7908	0	1.04419	0.0661962	0.687586	1.78516	3.96216	0.245566	100	6.339
			20	78.0254	12.5475	0.0115684	1.25464	0.121994	0.835025	3.37586	3.57778	0.250297	100	4.913
			21	78.1593	12.539	0	1.10786	0.113981	0.720107	3.17443	3.90093	0.284421	100	6.125
			22	77.9448	12.7843	0.00636085	0.960489	0.0879918	0.720896	3.43804	3.80167	0.255494	100	5.673
			23	77.4304	12.75	0.0202313	1.30226	0.124582	1.01902	3.61927	3.51066	0.223609	100	6.086
			24	77.5819	12.7684	0.018009	1.2744	0.151488	0.996854	3.49799	3.47575	0.235177	100	5.603
			Av	77.9133	12.654	0.00626745	1.12343	0.10482	0.79829	3.26311	3.89463	0.242087	100	4.86333
			Std	0.387951	0.121151	0.00694844	0.119263	0.0246052	0.111603	0.356956	0.314537	0.0141502		1.08277
CR-52	Rewa	BL34 053 753	Reading	SiO2	Al2O3	TiO2	FeO	MgO	CaO	Na2O	K2O	Cl	Total	Analytical sum prior to recalculation on an anhydrous basis
			1	76.0327	13	0.248941	2.0118	0.119795	1.00359	4.06144	3.32825	0.193467	100	5.32681
			2	74.5682	13.5213	0.356266	2.28455	0.276189	1.42359	4.17698	3.17128	0.221682	100	4.90518
			3	75.4647	13.1279	0.283023	1.99484	0.135116	1.05922	4.15426	3.56996	0.211029	100	5.01744
			4	74.928	13.3794	0.281235	2.16864	0.24436	1.27958	4.32533	3.20912	0.184273	100	3.1041
			5	73.757	13.5774	0.396106	2.53336	0.434158	1.63553	4.25641	3.2259	0.184094	100	2.38408
			6	75.8727	12.9821	0.160504	1.92833	0.117695	1.02228	4.32315	3.38875	0.204421	100	3.63774
			7	75.7858	12.9953	0.23505	1.94454	0.113686	1.05118	4.3564	3.32827	0.18975	100	2.86546
			8	75.7184	12.9611	0.212864	2.08027	0.119121	0.991053	4.3487	3.37476	0.193819	100	3.12135
			9	75.8095	13.0555	0.18223	2.06853	0.107692	0.981587	4.06566	3.55479	0.174577	100	3.00143
			10	74.2603	13.6982	0.481114	2.43389	0.38577	1.46923	3.87924	3.19121	0.20107	100	4.32349
			11	75.4552	13.2509	0.269197	2.18286	0.120868	1.17678	4.00625	3.33164	0.206374	100	2.87495
			12	75.8242	13.0312	0.232483	1.9804	0.102962	1.04124	3.9534	3.64215	0.191946	100	3.37668
			13	75.2061	13.5063	0.310292	2.33609	0.16032	1.26907	4.0891	2.94553	0.177144	100	5.05697
			14	75.2411	13.6082	0.256631	2.04346	0.170175	1.23849	4.18951	3.08216	0.170289	100	5.29401
			15	75.7874	13.176	0.261466	1.88668	0.128989	1.04555	4.29015	3.23529	0.188476	100	2.81996
			16	75.6839	12.9998	0.20468	2.04588	0.0901116	1.05303	4.27889	3.44444	0.199197	100	2.84581
			17	75.2889	13.0832	0.292702	2.12342	0.12991	0.974495	3.87627	3.80993	0.421189	100	11.9327
			18	74.8266	13.4513	0.262156	2.18739	0.270976	1.3493	4.32406	3.14402	0.184219	100	3.0758
			19	70.4601	17.1702	0.11185	1.46902	0.0674846	2.94148	5.39048	2.27969	0.109631	100	1.229
			Av	75.0511	13.4513	0.265199	2.08968	0.173441	1.26349	4.22872	3.27669	0.20035	100	4.01015
			Std	1.23258	0.909308	0.0812832	0.222988	0.099051	0.437021	0.313742	0.310034	0.0566275		2.16369
CR-66	Potaka	BL35 330 646	Reading	SiO2	Al2O3	TiO2	FeO	MgO	CaO	Na2O	K2O	Cl	Total	Analytical sum prior to recalculation on an anhydrous basis
			1	77.7992	12.6961	0	1.04031	0.098736	0.728138	3.36734	4.05506	0.215137	100	3.56157
			2	77.1997	12.8224	0.150091	1.24786	0.101128	0.973076	3.58249	3.69887	0.224394	100	3.75032
			3	77.7301	12.5729	0.0657356	0.921559	0.0831553	0.76644	3.56815	4.07648	0.215445	100	3.30441
			4	77.8501	12.6207	0.0777615	1.02798	0.0481884	0.661684	3.30284	4.18536	0.225332	100	3.39647
			5	77.6511	12.4794	0.029817	1.07114	0.10045	0.740928	3.55522	4.12802	0.24395	100	3.10074
			6	77.3897	12.5235	0.142051	1.31168	0.0964476	0.868229	3.40699	4.04365	0.217738	100	2.3704
			7	77.5732	12.5179	0.263289	1.14449	0.132566	0.874892	3.44987	3.82186	0.221892	100	3.43162
			8	77.8237	12.5363	0.178264	0.991831	0.099004	0.730665	3.44853	3.98008	0.211602	100	2.754
			9	77.6409	12.5775	0.0360465	1.05578	0.104497	0.707913	3.60789	4.03969	0.229851	100	3.8161
			10	77.9874	12.4049	0.029898	0.928451	0.0558356	0.742941	3.48876	4.133	0.228774	100	3.36328
			11	77.927	12.4035	0.197807	1.07666	0.0735312	0.83508	3.2814	4.00659	0.19846	100	3.59797
			12	78.0183	12.5486	0.0715068	0.997784	0.0480051	0.647703	3.4355	4.01513	0.21746	100	3.02759
			13	78.0296	12.4359	0.101459	0.965644	0.0983455	0.841989	3.37139	3.9353	0.220434	100	3.1787
			14	77.3385	12.6941	0.166598	1.06872	0.079525	0.762148	3.62619	4.04011	0.224137	100	2.8814
			15	77.9247	12.4371	0.0778705	1.08544	0.0899316	0.724071	3.40551	4.02882	0.226529	100	3.53167
			16	77.9469	12.3711	0.0537517	1.14547	0.104976	0.819603	3.35639	3.98479	0.217074	100	3.24694
			17	77.6883	12.4332	0.101403	1.18613	0.0884619	0.686606	3.46173	4.14357	0.210657	100	3.12501
			18	77.6284	12.4173	0.239282	1.32886	0.0974783	0.865999	3.28891	3.90492	0.228868	100	3.40266
			19	77.542	12.4682	0.190178	1.30028	0.103372	0.869884	3.49446	3.81647	0.215133	100	2.76916
			20	77.5007	12.4996	0.189957	1.12176	0.0662985	0.700428	3.63291	4.04726	0.241088	100	2.65602
			21	77.8938	12.569	0.0956176	0.943724	0.068933	0.683106	3.40737	4.10981	0.22864	100	3.30669
			22	77.3207	12.4264	0.144445	1.29343	0.125622	0.900229	3.58591	3.99778	0.205466	100	3.98846
			23	77.4323	12.6925	0.214437	1.06992	0.100335	0.736262	3.46341	4.07776	0.212993	100	2.98996
			24	77.5495	12.5657	0.132147	1.02486	0.0571883	0.664454	3.57229	4.21018	0.223624	100	3.79913
			Av	77.6827	12.5297	0.122892	1.09791	0.0884172	0.772186	3.46506	4.02002	0.221028	100	3.26459
			Std	0.23645	0.111172	0.0704985	0.12147	0.02188	0.0863701	0.105566	0.117077	0.0100312		0.392984
CR-53	Rewa	BL34 053 757	Reading	SiO2	Al2O3	TiO2	FeO	MgO	CaO	Na2O	K2O	Cl	Total	Analytical sum prior to recalculation on an anhydrous basis
			1	75.2355	13.4703	0.340324	2.11132	0.183593	1.20616	4.2155	3.0281	0.209258	100	4.91544
			2	75.3054	13.3938	0.346249	2.16077	0.130127	1.13357	4.1319	3.20413	0.19397	100	4.87376
			3	75.3159	13.4609	0.346161	2.18808	0.172347	1.22869	4.15183	2.92784	0.208219	100	4.84943
			4	75.0689	13.4272	0.380915	2.15711	0.152769	1.18354	4.25231	3.17975	0.197516	100	4.42873
			5	75.5078	13.5411	0.220209	2.11108	0.131035	1.17187	4.24415	2.87565	0.197123	100	5.5325
			6	75.8718	13.2279	0.135056	2.10893	0.118018	1.17904	3.97471	3.17407	0.210479	100	5.87119
			7	75.0586	13.5335	0.380367	2.42798	0.152763	1.22647	4.11162	2.91826	0.190483	100	5.81037
			8	74.9703	13.3959	0.311208	2.26505	0.126013	1.12545	4.20036	3.41368	0.191984	100	3.44666
			9	75.3813	13.3157	0.296936	2.04223	0.118719	1.19981	4.11533	3.31331	0.216688	100	4.64399
			Av	75.3017	13.4185	0.30638	2.17473	0.14282	1.18385	4.1553	3.11498	0.201747	100	4.93023
			Std	0.258527	0.094749	0.0761895	0.106945	0.0223871	0.0344575	0.0814018	0.177245	0.00894265		0.712361
CR-54	Rewa	BL34 068 763	Reading	SiO2	Al2O3	TiO2	FeO	MgO	CaO	Na2O	K2O	Cl	Total	Analytical sum prior to recalculation on an anhydrous basis
			1	75.6954	13.0684	0.244233	2.06007	0.0905249	0.943536	4.32923	3.38537	0.183202	100	2.99518
			2	75.2613	13.476	0.257911	2.15398	0.160777	1.17742	4.1423	3.21129	0.159036	100	5.89906
			3	75.5072	13.1055	0.327875	2.10368	0.145166	0.938507	4.46149	3.23249	0.178075	100	3.06765
			4	75.8562	13.0816	0.281033	1.91123	0.109621	0.928514	4.4934	3.15138	0.186993	100	5.41671
			5	75.7996	13.1976	0.285047	1.92431	0.136147	0.965617	3.87574	3.62179	0.194223	100	6.74847
			6	76.3918	13.1991	0.185417	1.90949	0.116556	0.942299	3.97695	3.10644	0.17189	100	6.50539
			7	74.3726	13.6749	0.487983	2.43236	0.16864	1.2791	4.45637	2.945	0.183108	100	5.2674
			8	75.8929	13.2321	0.220567	1.8756	0.113299	0.959649	4.26665	3.26793	0.171298	100	5.68588
			9	75.7342	13.2179	0.267764	1.83934	0.106965	0.952204	4.3873	3.31253	0.181785	100	5.04576
			10	75.5854	13.096	0.2922	2.15275	0.109182	0.945497	4.33926	3.28845	0.191294	100	3.0984
			11	75.8042	13.1442	0.292994	1.97309	0.119583	0.949224	4.21301	3.33213	0.171558	100	5.33321
			12	75.7054	12.9081	0.257633	2.1661	0.099826	0.950931	4.2323	3.50602	0.173685	100	3.55471
			13	74.7033	13.546	0.232854	2.19122	0.0994784	1.07397	4.48687	3.48447	0.181866	100	3.21775
			14	74.7205	13.518	0.300078	2.28306	0.109884	1.06703	4.41408	3.41075	0.176627	100	3.71695
			15	75.7746	12.9878	0.211014	2.12328	0.123631	0.945282	4.30374	3.36031	0.170336	100	4.1544
			16	75.6133	13.0913	0.245409	2.08477	0.104112	0.949038	4.31959	3.41103	0.181441	100	3.45994
			Av	75.5261	13.2215	0.274376	2.07402	0.119587	0.997988	4.29364	3.31421	0.178526	100	4.57293
			Std	0.503068	0.211054	0.065605	0.156353	0.0215587	0.0978916	0.171049	0.160597	0.00856317		1.2602
CR-57	Ridge	BL34 083 775	Reading	SiO2	Al2O3	TiO2	FeO	MgO	CaO	Na2O	K2O	Cl	Total	Analytical sum prior to recalculation on an anhydrous basis
			1	75.474	13.0568	0.292543	1.97379	0.10596	0.970618	3.72898	4.18677	0.21056	100	9.13783
			2	75.4377	13.1321	0.228612	2.06649	0.134157	0.947272	4.10555	3.78163	0.166476	100	1.42187
			3	75.7507	13.1204	0.243661	1.90424	0.107723	0.924176	4.45528	3.28655	0.207259	100	2.76744
			4	75.4859	13.2873	0.369439	1.95134	0.0905519	0.95146	4.35545	3.3315	0.177119	100	3.02417
			5	74.9758	13.2206	0.369639	2.12727	0.150019	0.907659	3.55069	4.47442	0.223916	100	6.20328
			6	75.578	13.1839	0.240362	1.98798	0.125424	0.958538	4.38461	3.36174	0.1795	100	3.83692
			7	75.9759	12.7094	0.33053	2.07194	0.132038	0.978864	4.06479	3.53231	0.204278	100	3.84627
			8	75.4153	13.1711	0.434716	2.03314	0.106851	0.946099	4.4524	3.27562	0.164741	100	2.9642
			9	75.7165	13.0239	0.305437	2.06692	0.138163	0.93709	4.40154	3.20686	0.203575	100	3.51425
			10	75.7304	13.1339	0.167576	1.88071	0.154504	0.871202	3.94353	3.94732	0.17085	100	3.44792
			Av	75.554	13.1039	0.298251	2.00638	0.124539	0.939298	4.14428	3.63847	0.190827	100	4.01642
			Std	0.255517	0.149804	0.076269	0.0758696	0.0199456	0.0300766	0.305471	0.417036	0.0202149		2.05015

## Sheet: Standards Summary
Oxide	SiO2	Al2O3	TiO2	FeO	MgO	CaO	Na2O	K2O	Cl
Standard used	ATHOG-28	ATHOG-28	ATHOG-28	ATHOG-28	ATHOG-28	ATHOG-28	ATHOG-28	ATHOG-28	ATHOG-28
Reference value	75.6	12.2	0.255	3.27	0.103	1.7	3.75	2.64	0.0243
Average (wt%)	75.8045	12.3046	0.323691	3.24857	0.099461	1.74451	3.73429	2.69936	0.0410372
% offset from standard	0.270474	0.857455	26.9377	0.655498	3.43595	2.61848	0.418986	2.24833	68.8773
standard deviation	0.191284	0.0836282	0.0516742	0.0856375	0.0123823	0.0279004	0.149958	0.0556121	0.00756439

## Sheet: Standards Bulk
ATHOG-28	n/a	n/a	Reading	SiO2	Al2O3	TiO2	FeO	MgO	CaO	Na2O	K2O	Cl	Total	Analytical sum prior to recalculation on an anhydrous basis
			1	75.8222	12.2844	0.286557	3.22837	0.0853555	1.72134	3.9518	2.58317	0.0367756	100	0
			2	75.8607	12.3107	0.279469	3.29651	0.117225	1.73092	3.69308	2.67921	0.0322086	100	0
			3	75.7439	12.2142	0.324982	3.20259	0.116729	1.77341	3.80772	2.78869	0.0277256	100	0.28362
			4	75.4177	12.4753	0.311287	3.22565	0.112129	1.73131	3.90578	2.78149	0.0394143	100	0.628751
			5	75.6809	12.2817	0.316669	3.26439	0.110419	1.77422	3.80974	2.70553	0.0564411	100	0
			6	75.5904	12.4468	0.373581	3.12427	0.0999264	1.76718	3.81595	2.74254	0.0393401	100	0.441332
			7	75.573	12.1724	0.365186	3.24447	0.100651	1.75636	3.97006	2.77858	0.039233	100	0.169379
			8	75.9508	12.3596	0.373475	3.14124	0.0889092	1.74762	3.66645	2.63372	0.0381722	100	0.412957
			9	75.9069	12.3355	0.33671	3.15818	0.0919533	1.7317	3.72355	2.67541	0.0400709	100	-0.617838
			10	75.6453	12.3975	0.217348	3.43694	0.0995224	1.71206	3.77752	2.67122	0.0426382	100	0.0371729
			11	76.0558	12.3581	0.360266	3.13217	0.110373	1.76541	3.45625	2.71404	0.0476353	100	0.850421
			12	75.5983	12.2717	0.232032	3.3472	0.0845751	1.73966	4.02633	2.65186	0.0483893	100	0.0147345
			13	75.6869	12.2259	0.370932	3.3551	0.105234	1.70681	3.78223	2.72401	0.0429053	100	0
			14	75.8715	12.2984	0.29218	3.36384	0.116057	1.72889	3.64478	2.64452	0.0397433	100	0.0498425
			15	75.8596	12.2562	0.387499	3.22452	0.0751369	1.77786	3.72316	2.64541	0.0506863	100	0
			16	76.0016	12.2511	0.277221	3.37213	0.0808847	1.68374	3.57156	2.73174	0.0300629	100	0.372799
			17	76.2581	12.1436	0.30103	3.23589	0.0993977	1.72921	3.48163	2.6988	0.0523155	100	0.912648
			18	75.8296	12.2772	0.258914	3.28505	0.0879339	1.71698	3.7719	2.72961	0.0428107	100	0.439805
			19	75.991	12.2866	0.374442	3.15692	0.107281	1.77361	3.57616	2.68512	0.0488639	100	0.640486
			20	75.6507	12.3198	0.40886	3.23948	0.108901	1.77685	3.6727	2.78515	0.0375914	100	0.198808
			21	75.8993	12.4301	0.34887	3.18499	0.0900875	1.78965	3.59169	2.63662	0.0287575	100	0.23764
			Av	75.8045	12.3046	0.323691	3.24857	0.099461	1.74451	3.73429	2.69936	0.0410372	100	0.24155
			Std	0.191284	0.0836282	0.0516742	0.0856375	0.0123823	0.0279004	0.149958	0.0556121	0.00756439		0.339822
VG568	n/a	n/a	Reading	SiO2	Al2O3	TiO2	FeO	MgO	CaO	Na2O	K2O	Cl	Total	Analytical sum prior to recalculation on an anhydrous basis
			1	77.4645	12.2474	0.00370903	1.18367	0.0400808	0.443769	3.56182	4.96929	0.0858588	100	0.715161
			2	77.7626	12.2926	0.00741524	0.978219	0.0160262	0.412418	3.51527	4.92267	0.092785	100	0.67742
			3	77.7231	12.1653	0.0996275	1.18351	0.0378805	0.438478	3.62683	4.6133	0.111964	100	0.200667
			4	77.3759	12.2105	0.107615	1.0976	0.0280705	0.456071	3.76439	4.85537	0.104475	100	0.764567
			5	77.5331	12.1758	0.0371371	1.08848	0.042138	0.425186	3.75181	4.83719	0.109202	100	0.840443
			6	77.7816	12.2794	0.0780489	0.946676	0.0351425	0.450727	3.49728	4.84396	0.0871971	100	0.917871
			7	77.5288	12.2092	0.0781312	1.15039	0.0452308	0.453221	3.52088	4.90591	0.108238	100	1.02222
			8	77.285	12.2635	0.132823	1.2329	0.0328929	0.443439	3.69887	4.80669	0.103874	100	0.190652
			9	77.6128	12.1705	0.148167	1.15726	0.0250177	0.423089	3.62764	4.76717	0.0683654	100	0.585089
			10	77.6864	12.2574	0.0110981	1.14385	0.0419754	0.445626	3.44807	4.86612	0.0995224	100	0.456321
			11	77.3883	12.1837	0.0184879	1.13337	0.041955	0.450425	3.72672	4.93909	0.117981	100	0.407907
			12	77.2431	12.3533	0.0960079	1.11995	0.02893	0.467853	3.7294	4.85524	0.106271	100	0.273807
			13	77.5904	12.3117	0.0242501	1.04764	0.0179487	0.419936	3.55857	4.94042	0.089184	100	1.01984
			14	77.3406	12.2981	0.104755	1.07838	0.0273651	0.462207	3.65608	4.94686	0.085571	100	0.709243
			15	77.6879	12.1257	0.0689914	1.02072	0.0307444	0.446167	3.55913	4.95774	0.102984	100	1.42545
			16	77.4493	12.209	0.0521722	1.11725	0.0221488	0.433738	3.78033	4.82998	0.106083	100	1.183
			17	77.3035	12.2101	0.0556567	1.32355	0.0300721	0.448972	3.76837	4.75535	0.104463	100	0.753166
			18	77.3948	12.2001	0.118842	1.13535	0.0471557	0.471546	3.74087	4.78555	0.105719	100	0.843112
			19	77.6604	12.1618	0.0605132	0.936527	0.0389927	0.46889	3.59616	4.95322	0.123514	100	0.836567
			20	77.484	12.2217	0.0442383	1.0734	0.027315	0.440114	3.56671	5.03717	0.105381	100	0.526971
			21	77.6561	12.2061	0.00809916	1.00947	0.032794	0.446225	3.5785	4.97008	0.0927091	100	1.2128
			22	77.3834	12.2259	0.0280994	1.19301	0.05348	0.448387	3.60296	4.96733	0.0974353	100	0.342184
			23	77.8037	12.2753	0.0361971	0.877748	0.0399243	0.438116	3.47888	4.94803	0.102059	100	0.532887
			24	76.9811	12.1442	0.100462	1.78592	0.0262435	0.440775	3.52418	4.90508	0.0919967	100	0.447863
			Av	77.505	12.2249	0.063356	1.12562	0.0337302	0.444807	3.61999	4.88245	0.100118	100	0.70355
			Std	0.197339	0.056048	0.0419496	0.16941	0.0091826	0.0147207	0.100484	0.0912357	0.0116253		0.31887
