# Supplementary material
Source: publisher figshare collection journal article supplement (https://tandf.figshare.com/articles/dataset/_/11097479)

Supplementary Data File C: Geological map of the study area showing lithological groups, regional structures and the location of the Potaka Pumice and Pakihikura Pumice; two widespread regional marker horizons used to define the base of the Kai Iwi and Okehu Groups respectively. Sample points are shown from Pillans et al. 2005 and this study, state highways are shown in grey. This work draws from the geological maps of Feldmeyer et al. (1943), Te Punga (1952), Fleming (1953), Milne (1973), Naish and Kamp (1995), van der Neut (1996), Townsend et al. (2008), Lee et al. (2011).

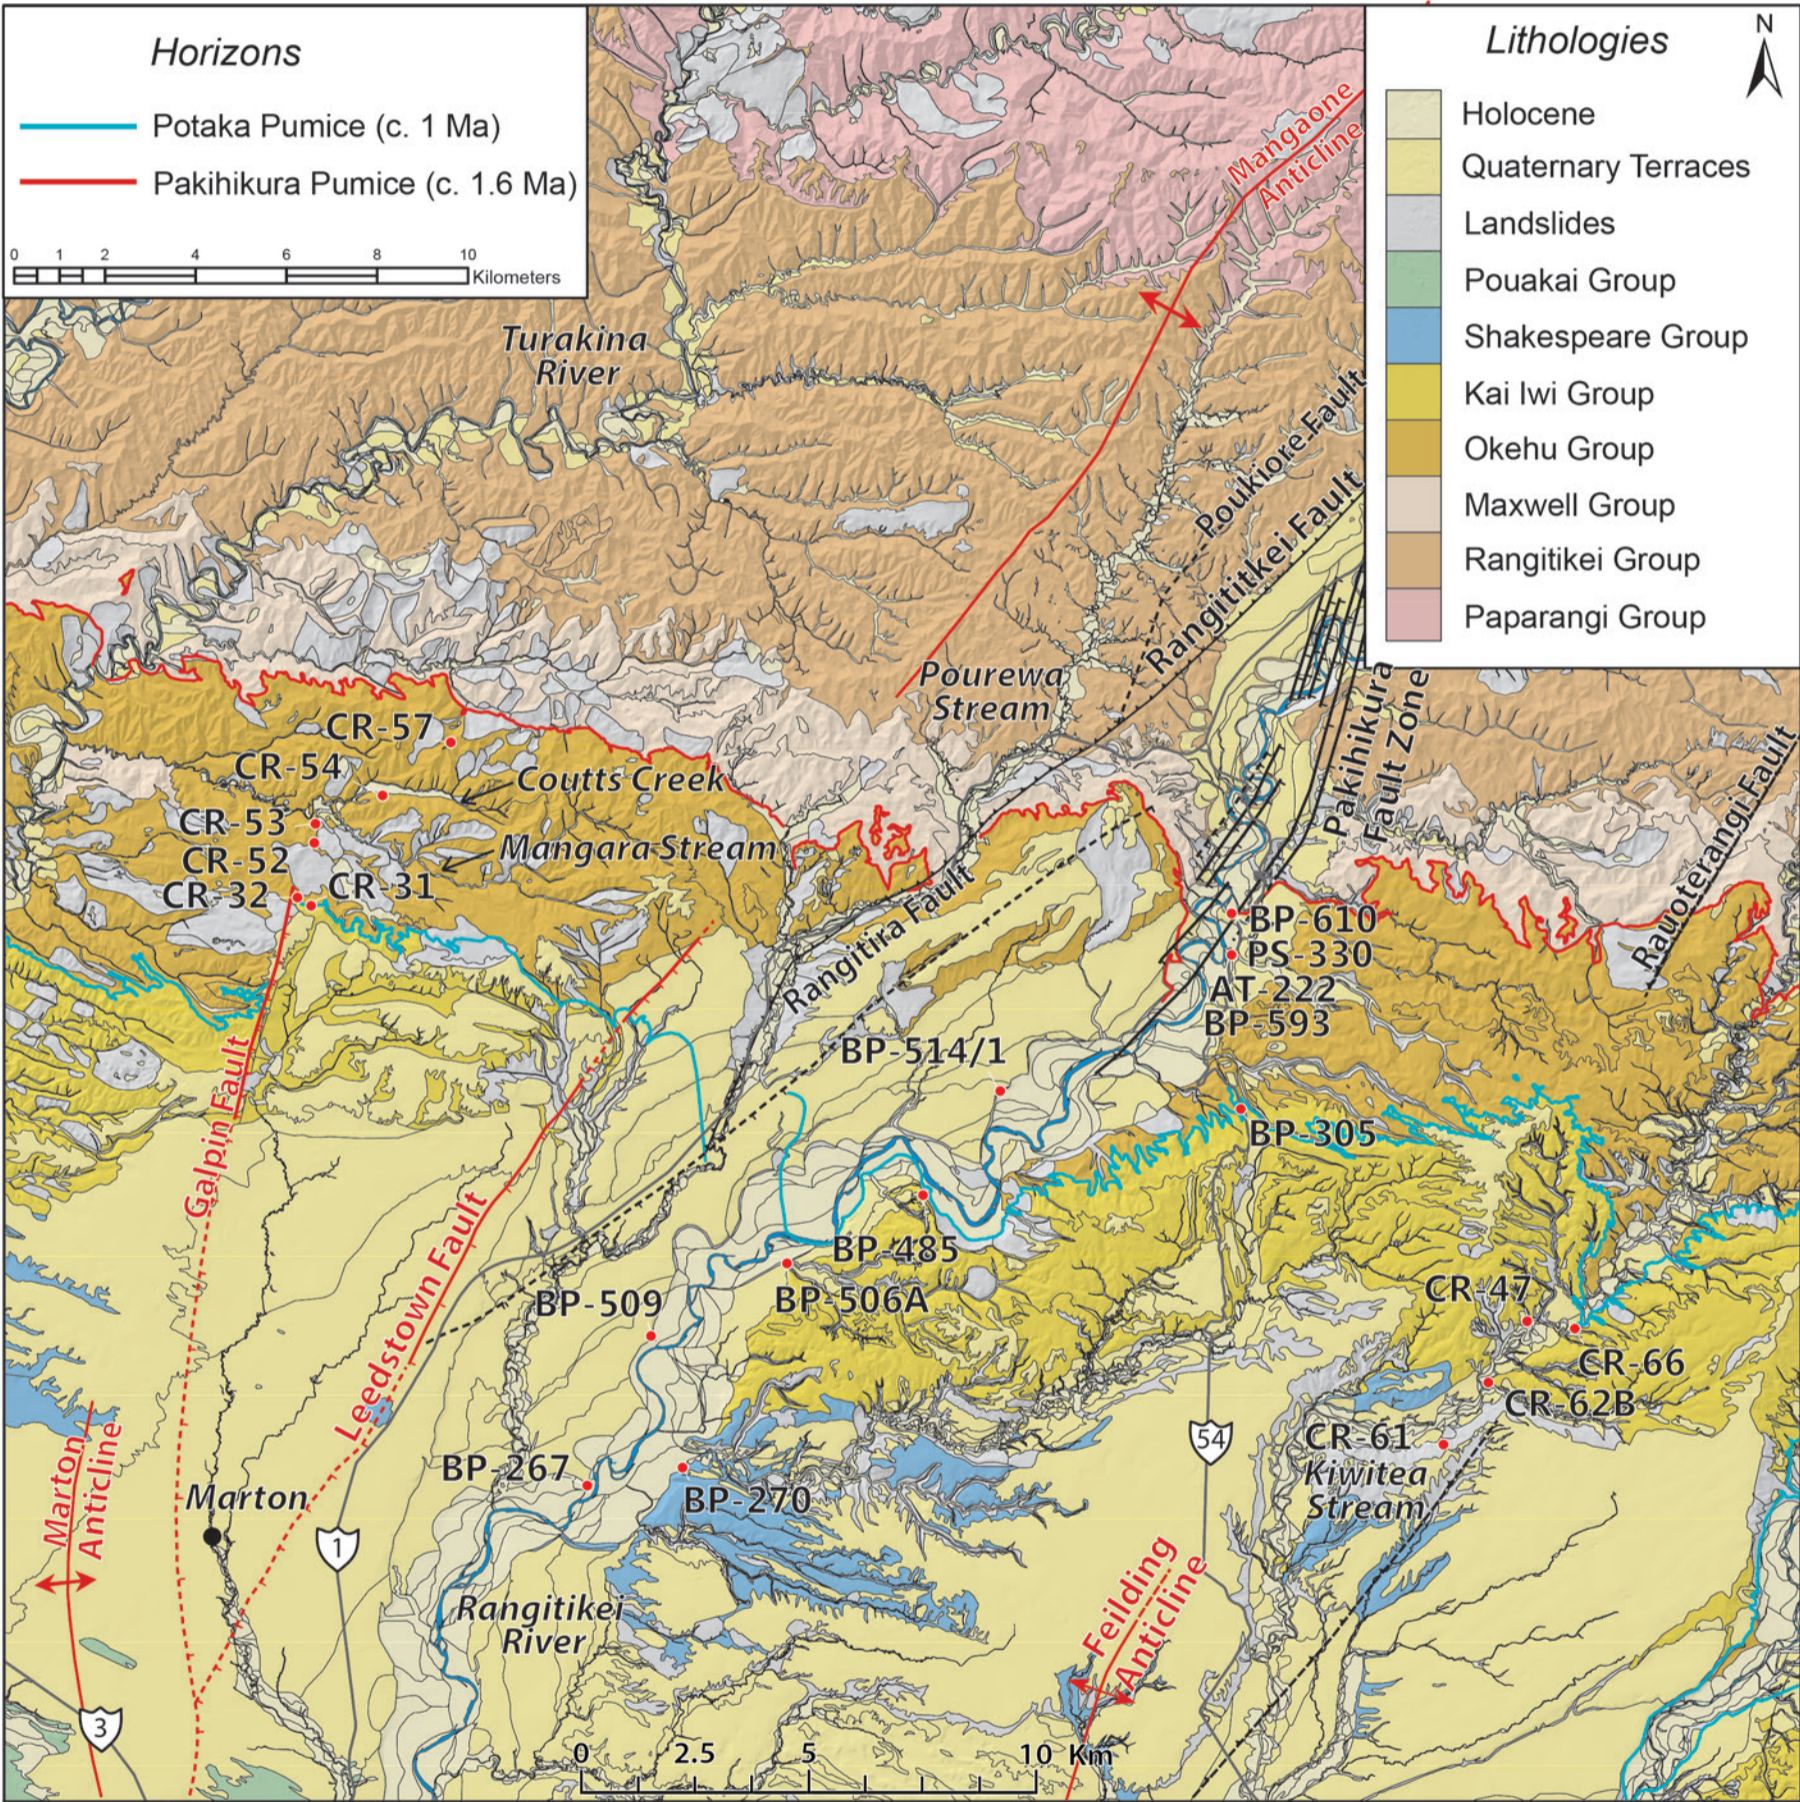

Supplement: Supplementary file 1 [file 1 › tnzg_a_1691611_sm5187.pdf]
